# Supplementary material for: Synthesis and In Vitro Antiproliferative Activity of 11-Substituted Neocryptolepines with a Branched ω-Aminoalkylamino Chain
Source: PubMed Central journal article supplement (PMC6150407; doi:10.3390/molecules22111954), 2017-11-12
Supplement: molecules-22-01954-s001.pdf [file molecules-22-01954-s001.pdf]

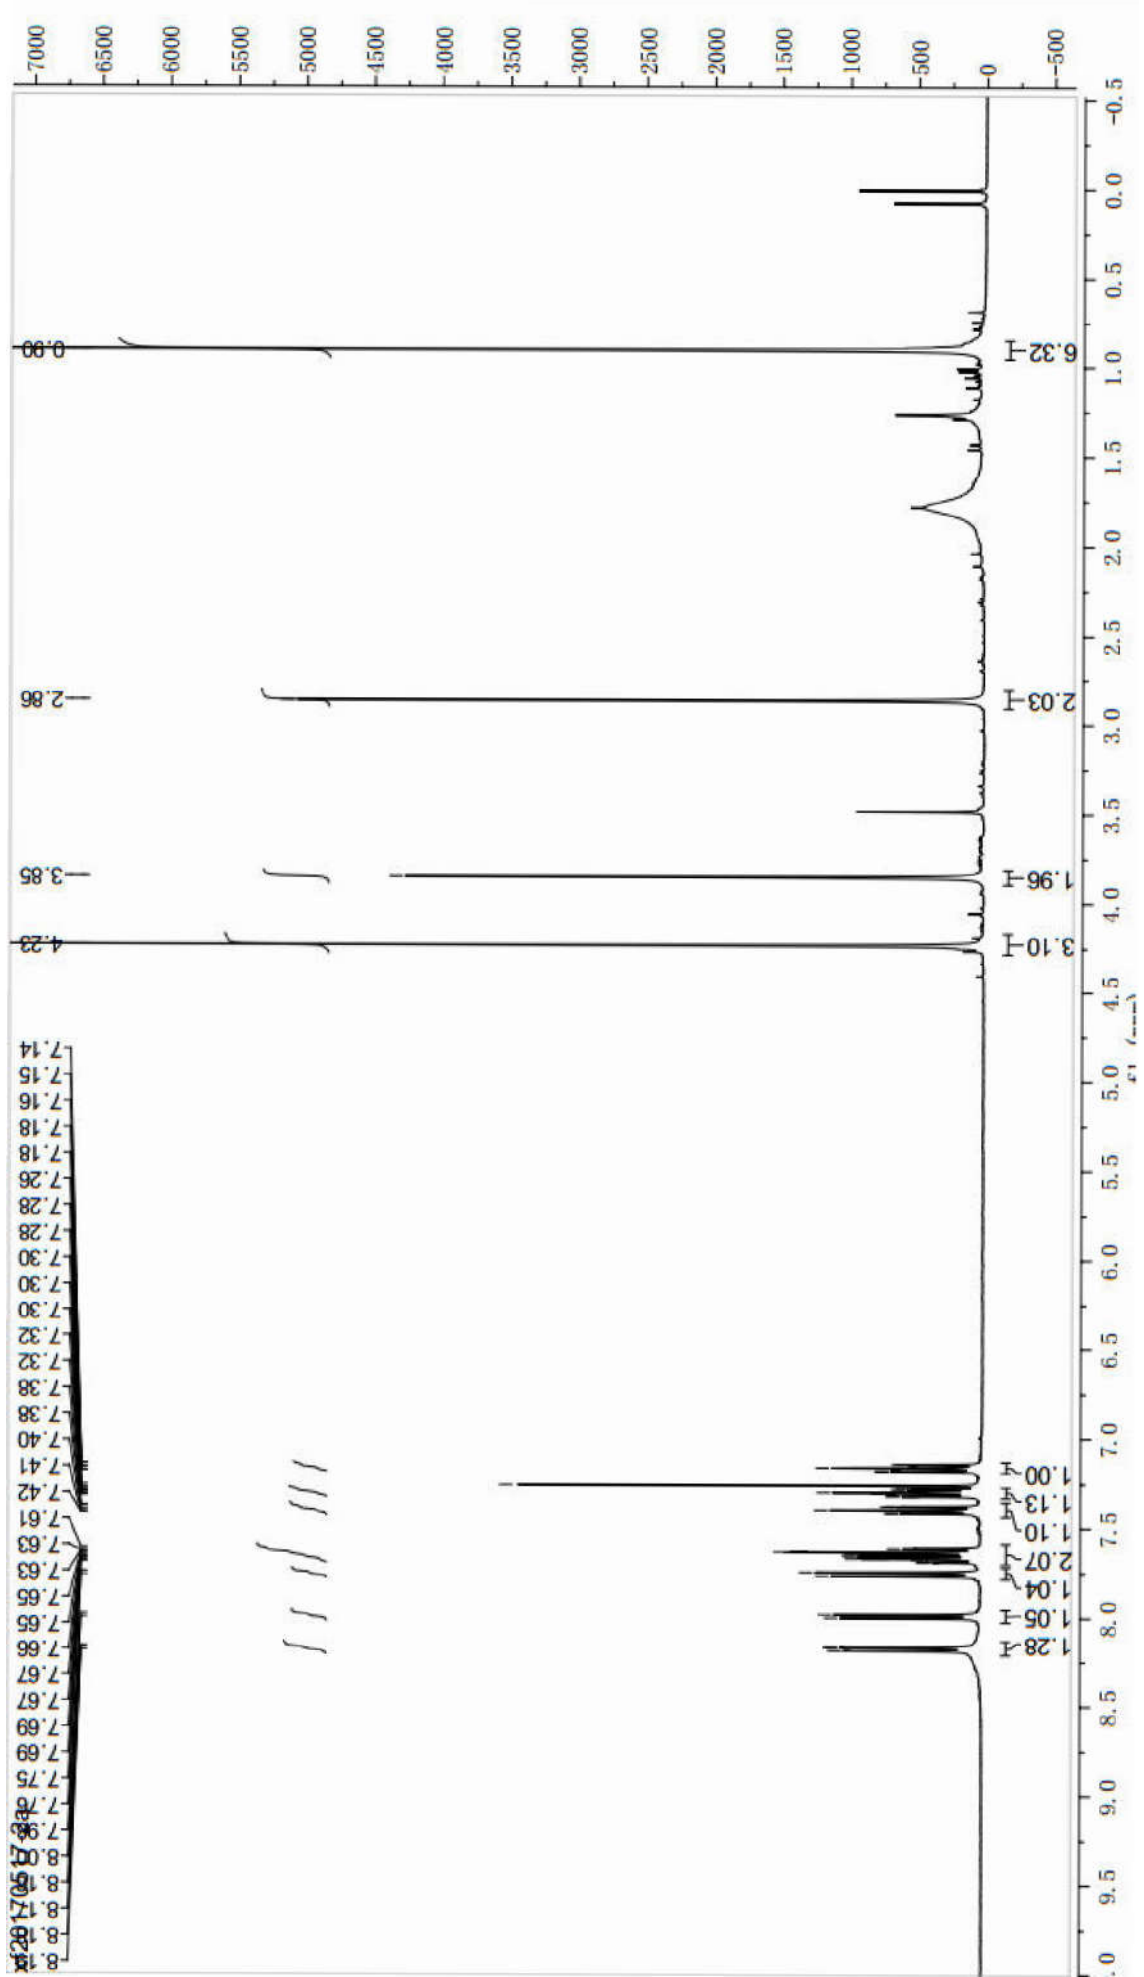

2a  $^1\text{H}$  NMR

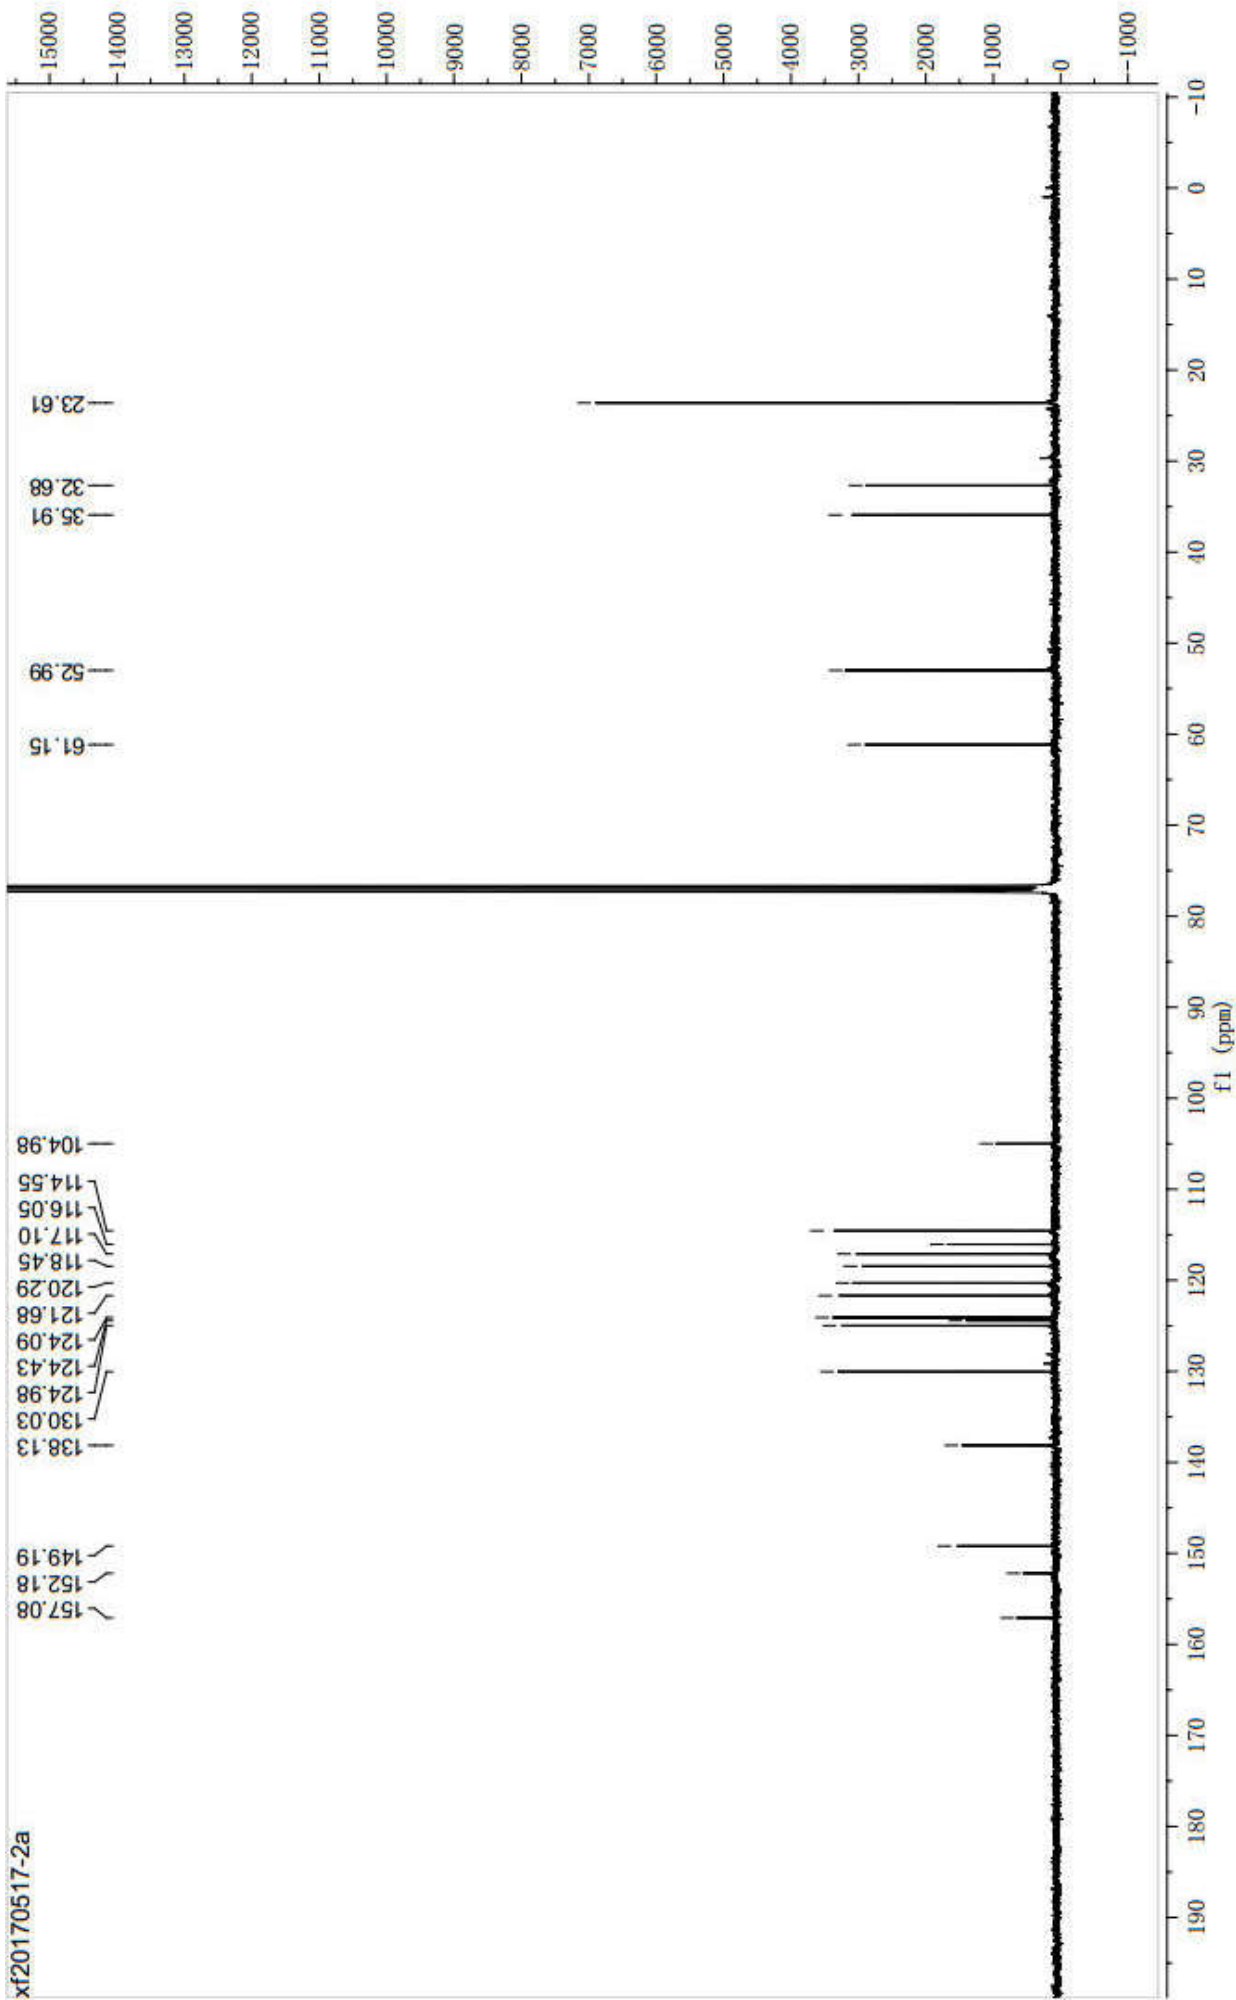

xf20170517-2a

2a <sup>13</sup>C NMR

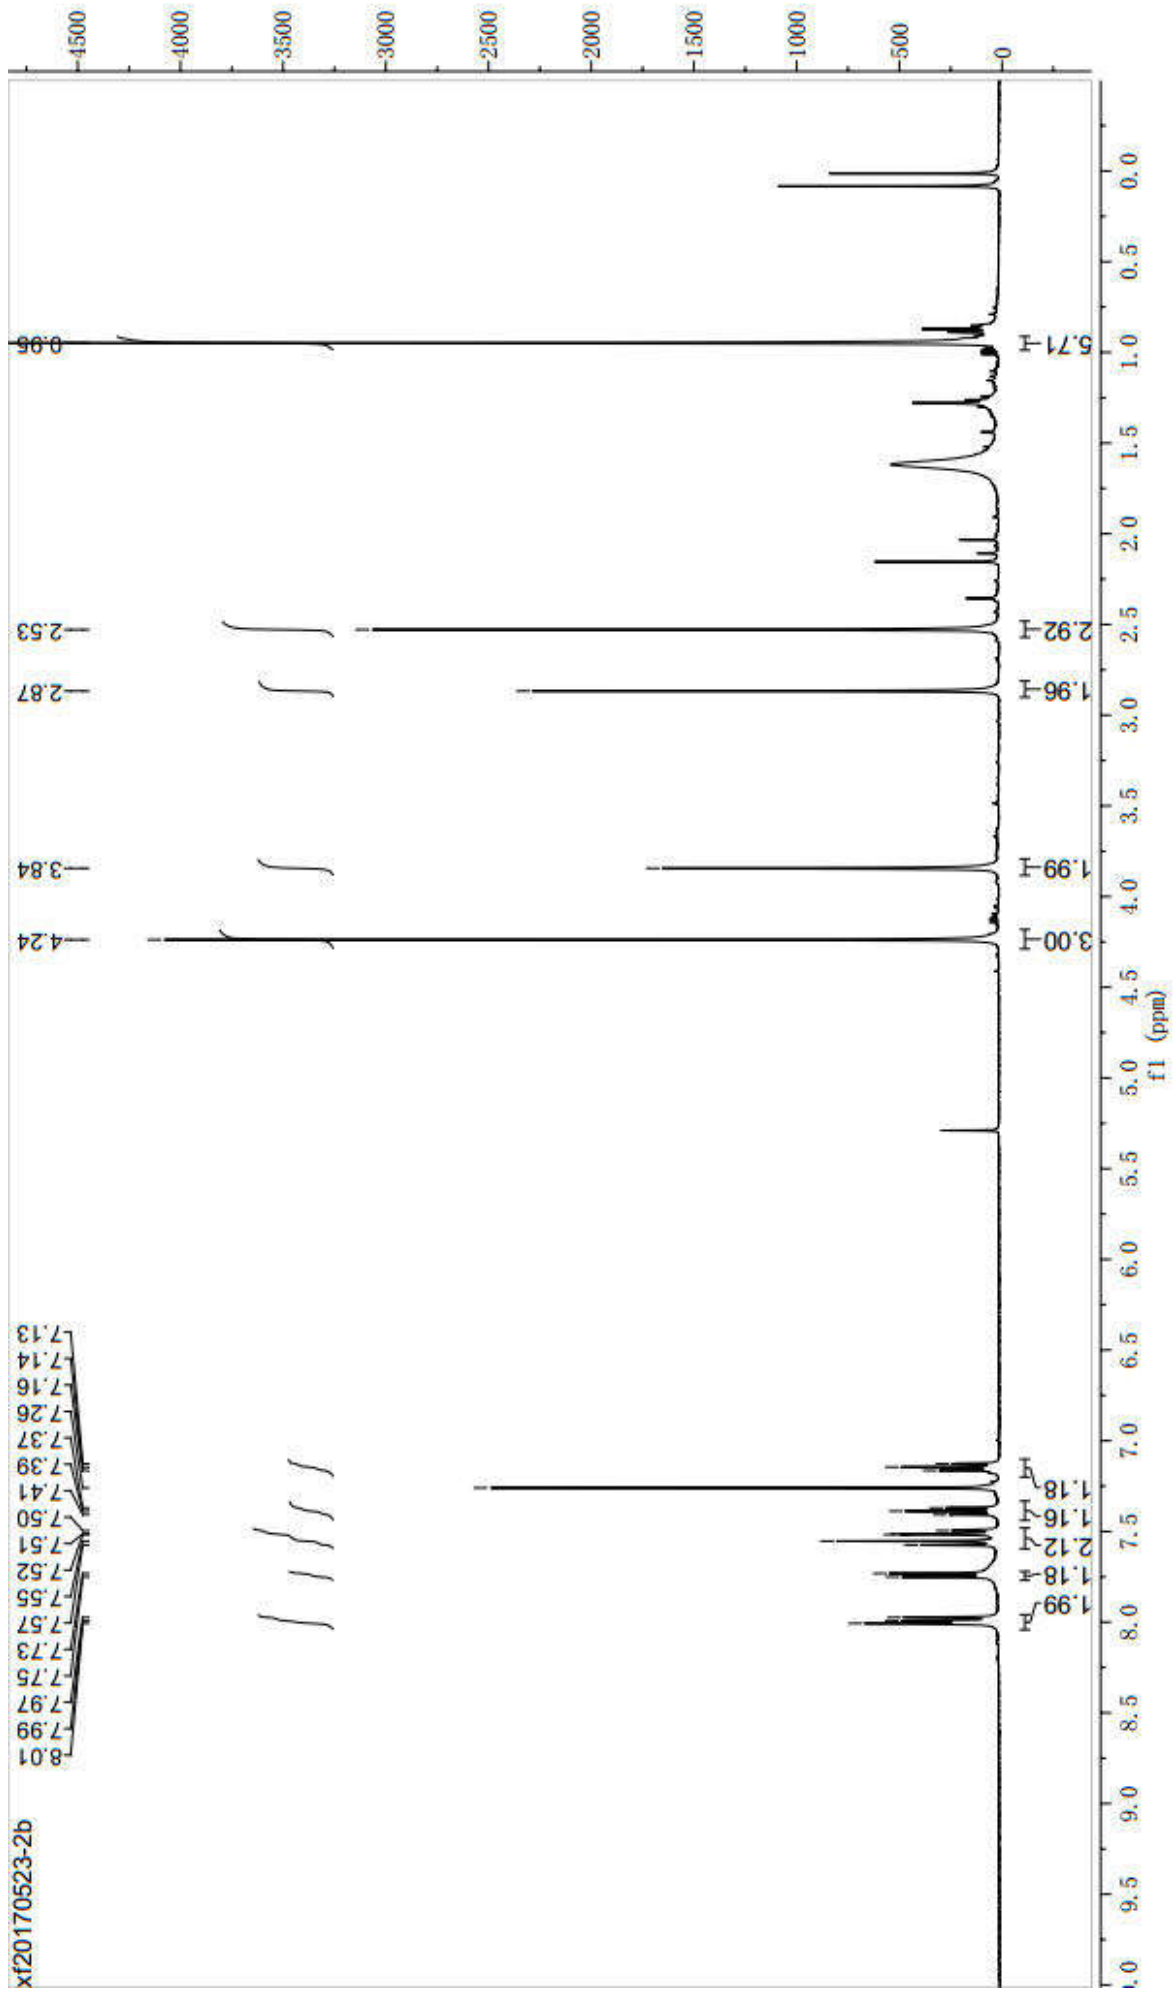

2b 1H NMR

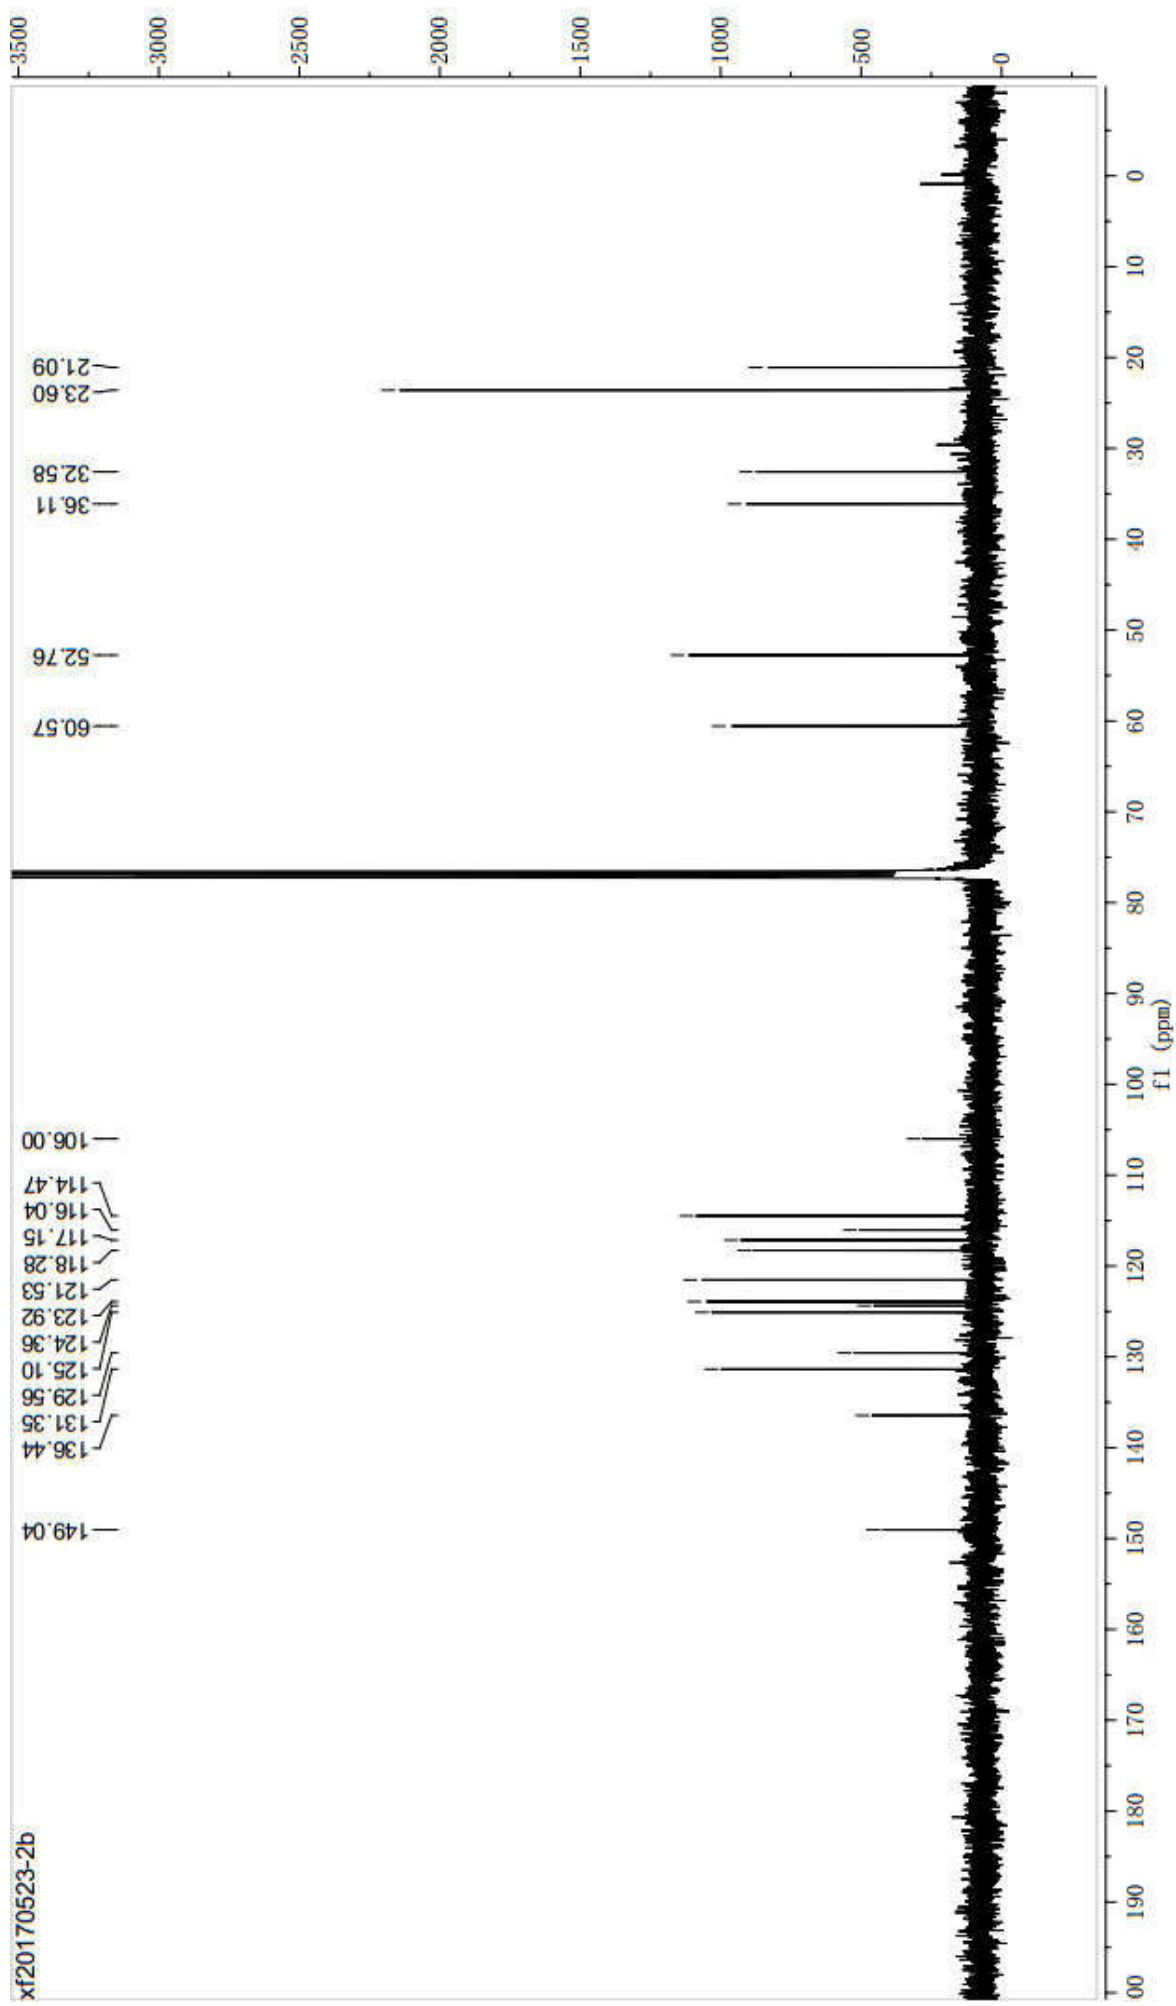

2b 13C NMR

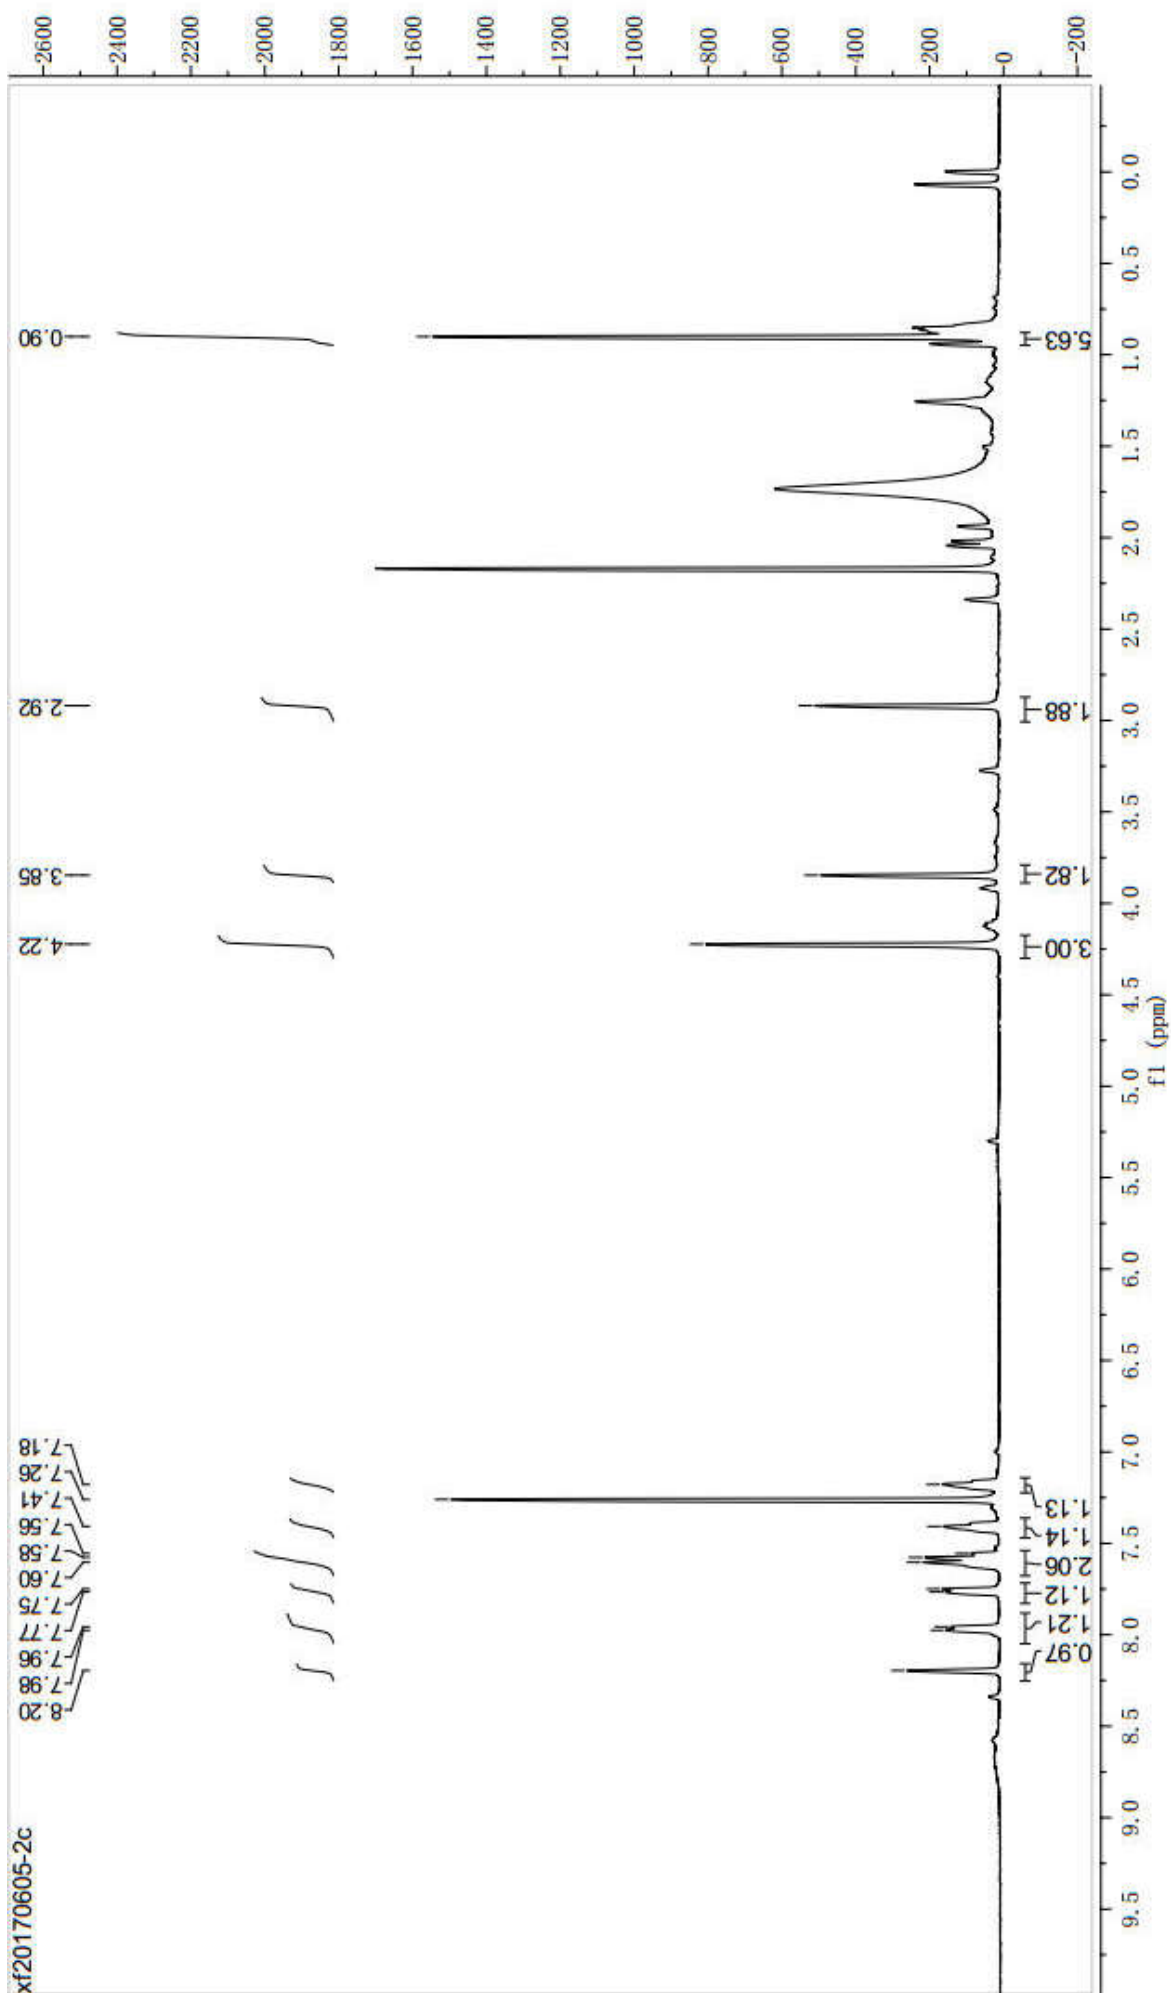

2c 1HNMR

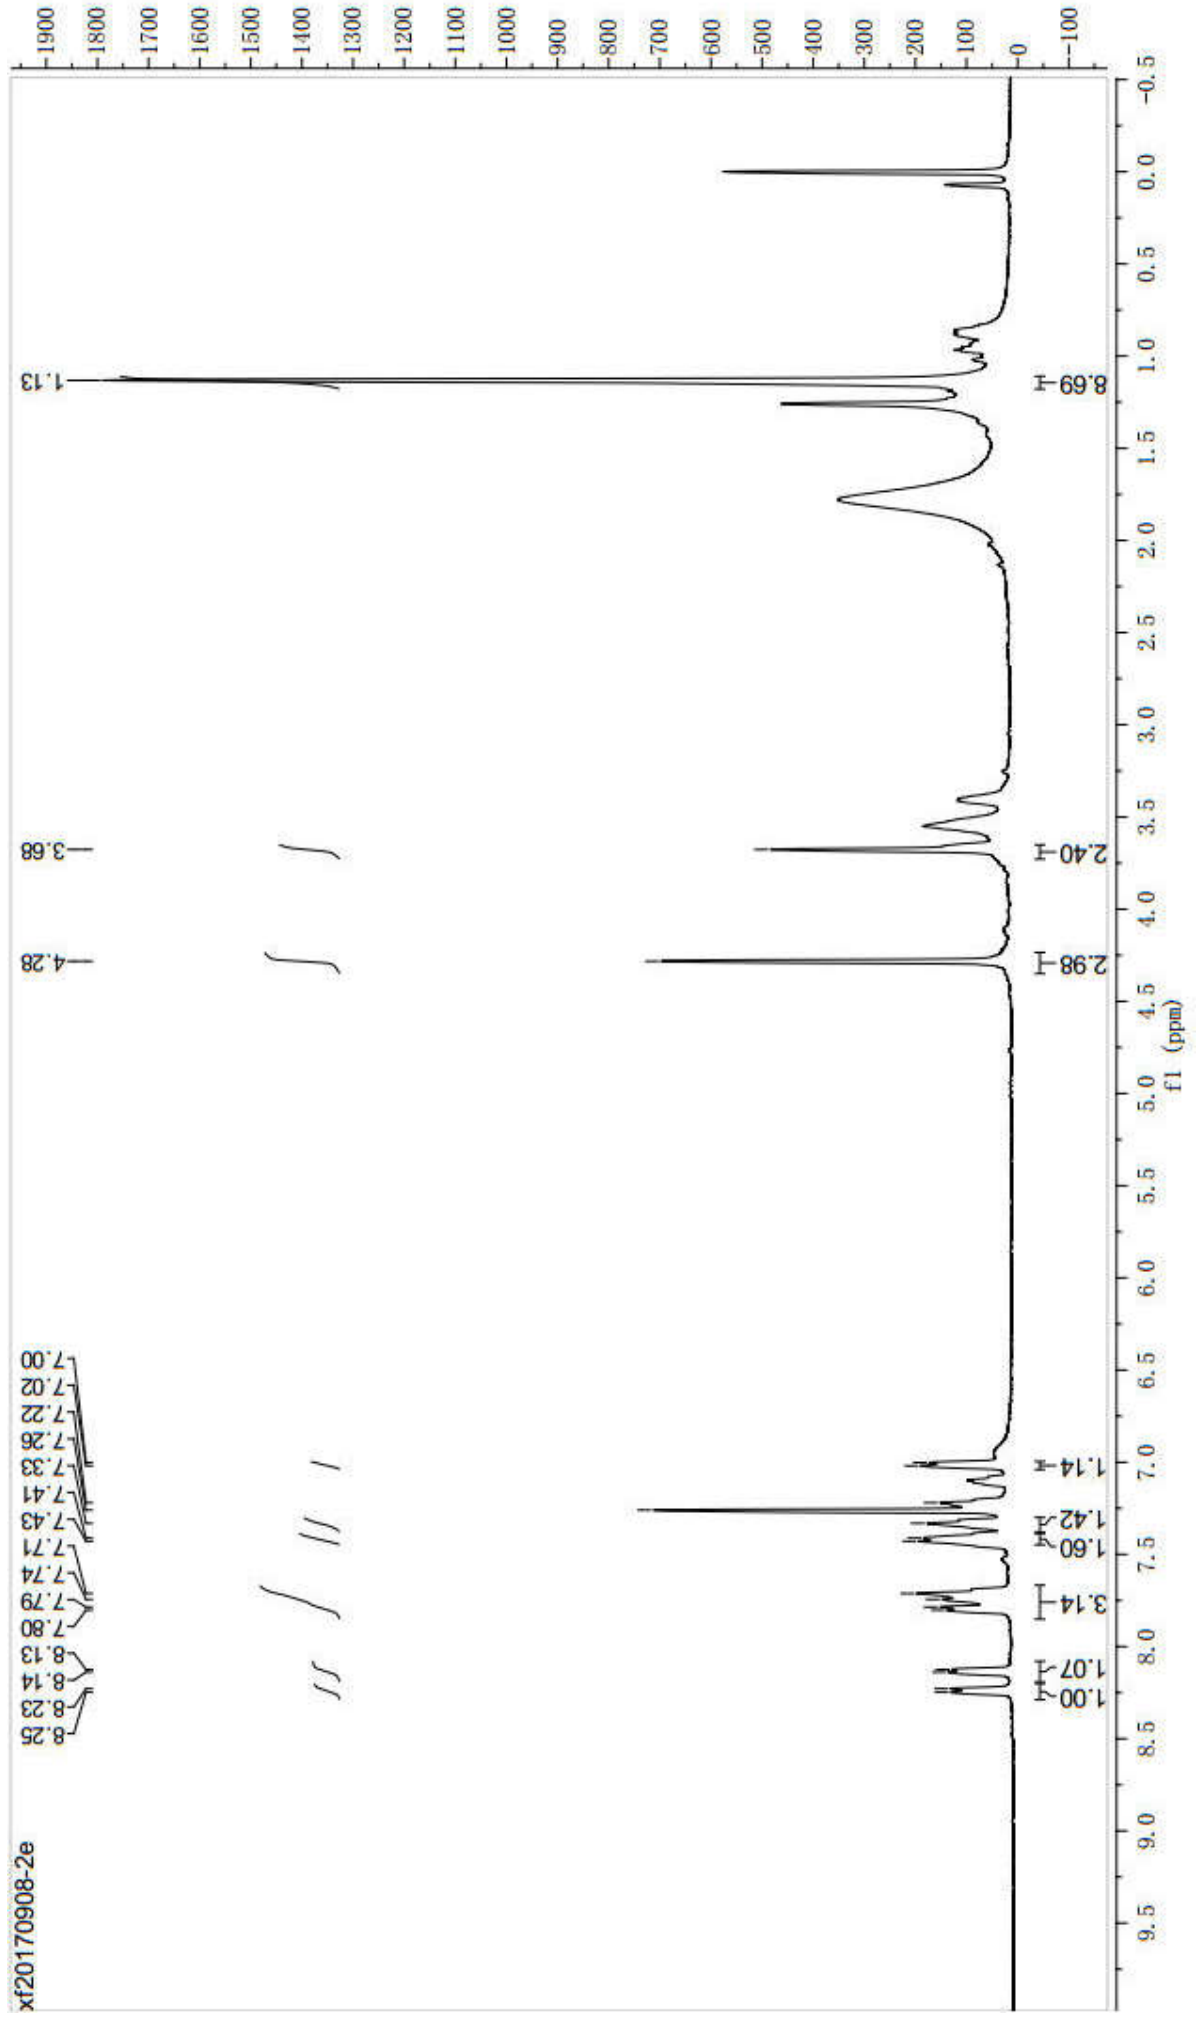

2e 1H NMR

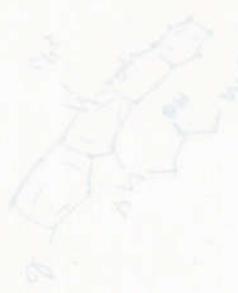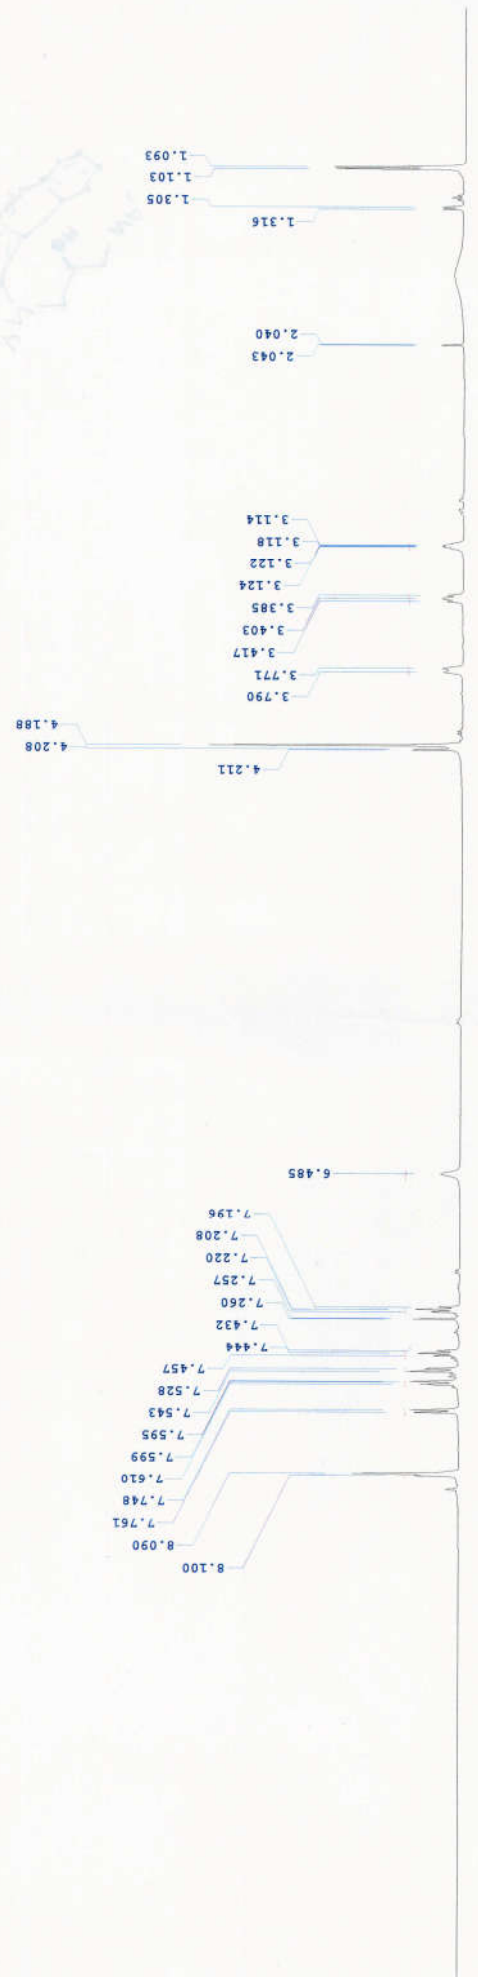

|                                                                                                                                         |                                |                                                                                             |                                                                                              |                                            |
|-----------------------------------------------------------------------------------------------------------------------------------------|--------------------------------|---------------------------------------------------------------------------------------------|----------------------------------------------------------------------------------------------|--------------------------------------------|
| <p>PULSER SEQUENCE<br/>Relax. delay 1.592 sec<br/>Pulse 45.0 degrees<br/>Acq. time 3.408 sec<br/>Width 9615.4 Hz<br/>16 repetitions</p> | <p>OBSERVE H1, 599.7712267</p> | <p>DATA PROCESSING<br/>Line broadening 0.3 Hz<br/>FT size 65536<br/>Total time 1 minute</p> | <p>Solvent: cdcl3<br/>Ambient temperature<br/>Operator: walkup<br/>VNMR5-600 "varian600"</p> | <p>File: exp<br/>Pulse Sequence: s2pul</p> |
|-----------------------------------------------------------------------------------------------------------------------------------------|--------------------------------|---------------------------------------------------------------------------------------------|----------------------------------------------------------------------------------------------|--------------------------------------------|

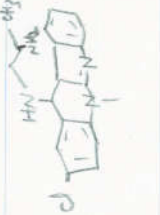

2

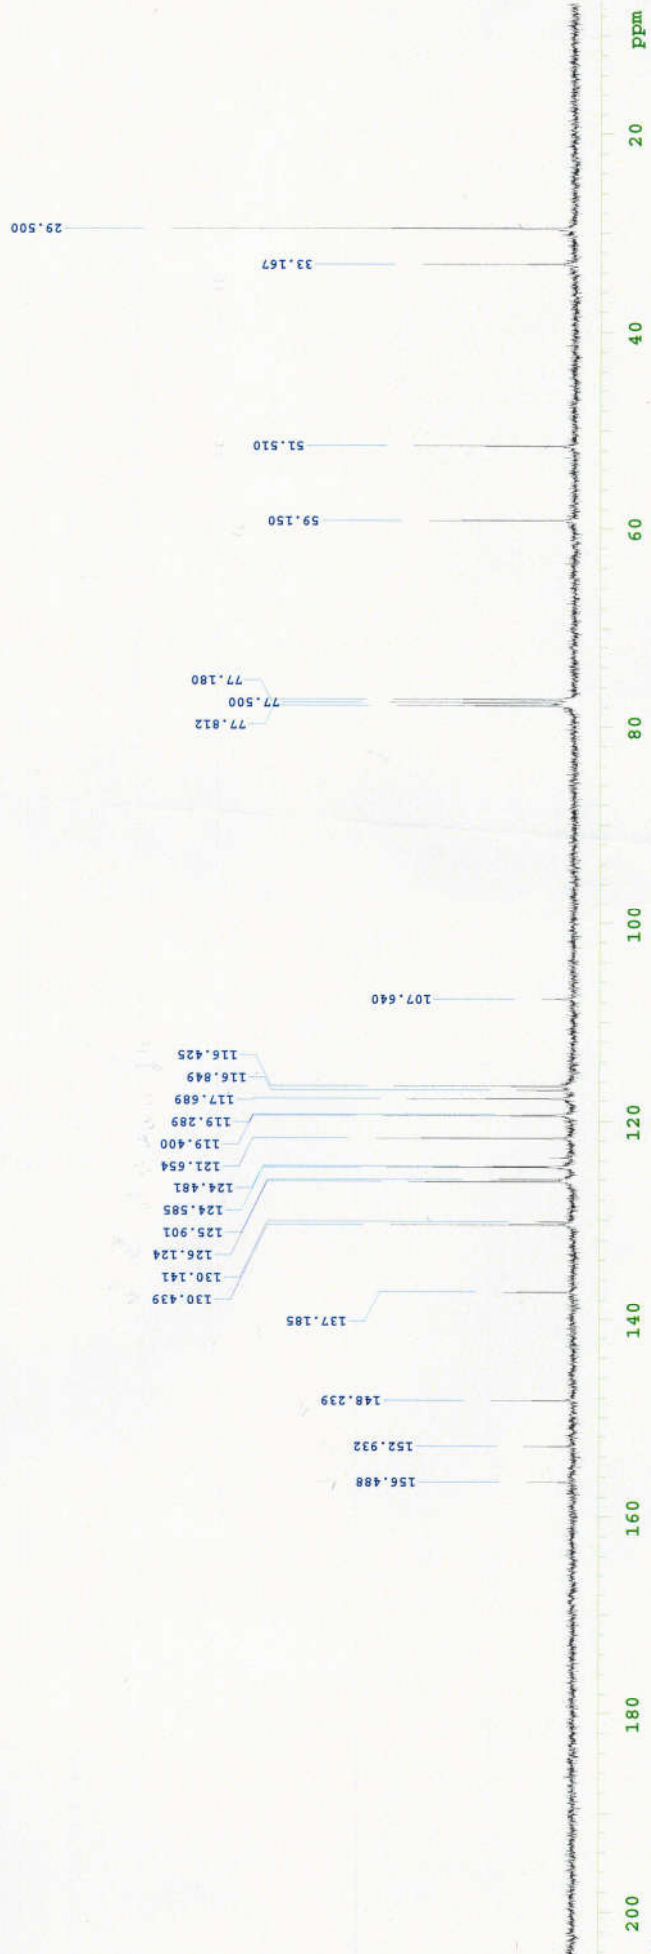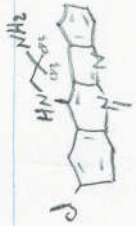

|                                                           |                                                                                               |                                                                                                |           |                                                                                                                                             |                              |
|-----------------------------------------------------------|-----------------------------------------------------------------------------------------------|------------------------------------------------------------------------------------------------|-----------|---------------------------------------------------------------------------------------------------------------------------------------------|------------------------------|
| <p>File: /home/walkup/vnmrsys/data/data/s2pul_001.fid</p> | <p>DATA PROCESSING<br/>Line broadening 1.0 Hz<br/>FT size 65536<br/>Total time 17 minutes</p> | <p>Solvent: cdcl3<br/>Ambient temperature<br/>Operator: walkup<br/>VNMR-400 "Varian-400MR"</p> | <p>28</p> | <p>Observe C13, 100.5573036<br/>Decouple H1, 399.9115921<br/>Power 42 dB<br/>continuously on<br/>WALTZ-16 modulated<br/>512 repetitions</p> | <p>Pulse Sequence: s2pul</p> |
|-----------------------------------------------------------|-----------------------------------------------------------------------------------------------|------------------------------------------------------------------------------------------------|-----------|---------------------------------------------------------------------------------------------------------------------------------------------|------------------------------|



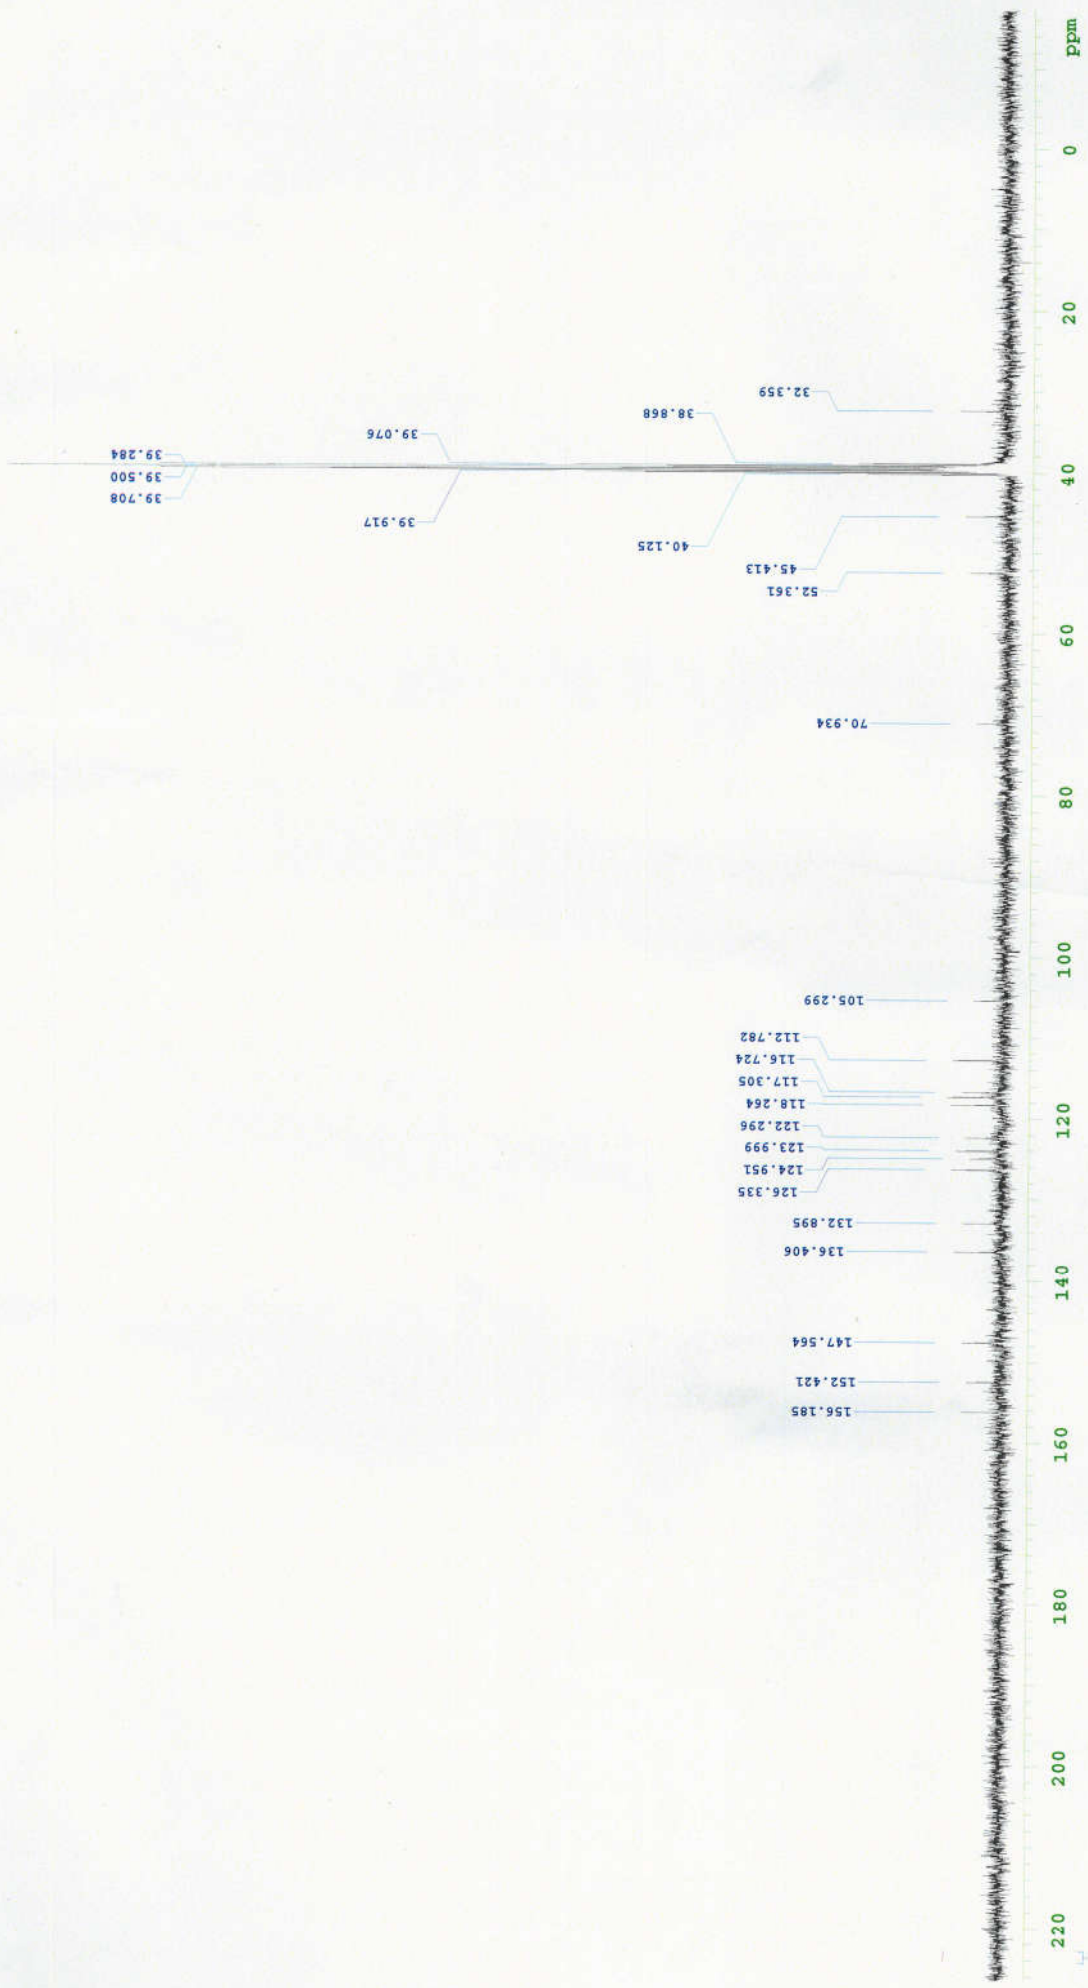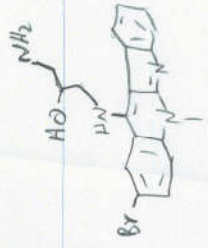

|                                                                                                                                          |                                                                                                                         |                                                                                               |                                                                                               |                                                      |
|------------------------------------------------------------------------------------------------------------------------------------------|-------------------------------------------------------------------------------------------------------------------------|-----------------------------------------------------------------------------------------------|-----------------------------------------------------------------------------------------------|------------------------------------------------------|
| <p>PULSE SEQUENCE<br/>Relax. delay 0.700 sec<br/>Pulse 45.0 degrees<br/>Acq. time 1.300 sec<br/>Width 24509.8 Hz<br/>512 repetitions</p> | <p>OBSERVE C13, 100.5578678<br/>DECOUPLE H1, 399.9134917<br/>Power 42 dB<br/>continuously on<br/>WALTZ-16 modulated</p> | <p>DATA PROCESSING<br/>Line broadening 1.0 Hz<br/>FT size 65536<br/>Total time 17 minutes</p> | <p>Solvent: dmsc<br/>Ambient temperature<br/>Operator: vmmrl<br/>VNMRS-400 *Varian-400MR*</p> | <p>sh 590<br/>File: xp<br/>Pulse Sequence: s2pul</p> |
| <p>File: Data not saved yet</p>                                                                                                          |                                                                                                                         |                                                                                               |                                                                                               |                                                      |

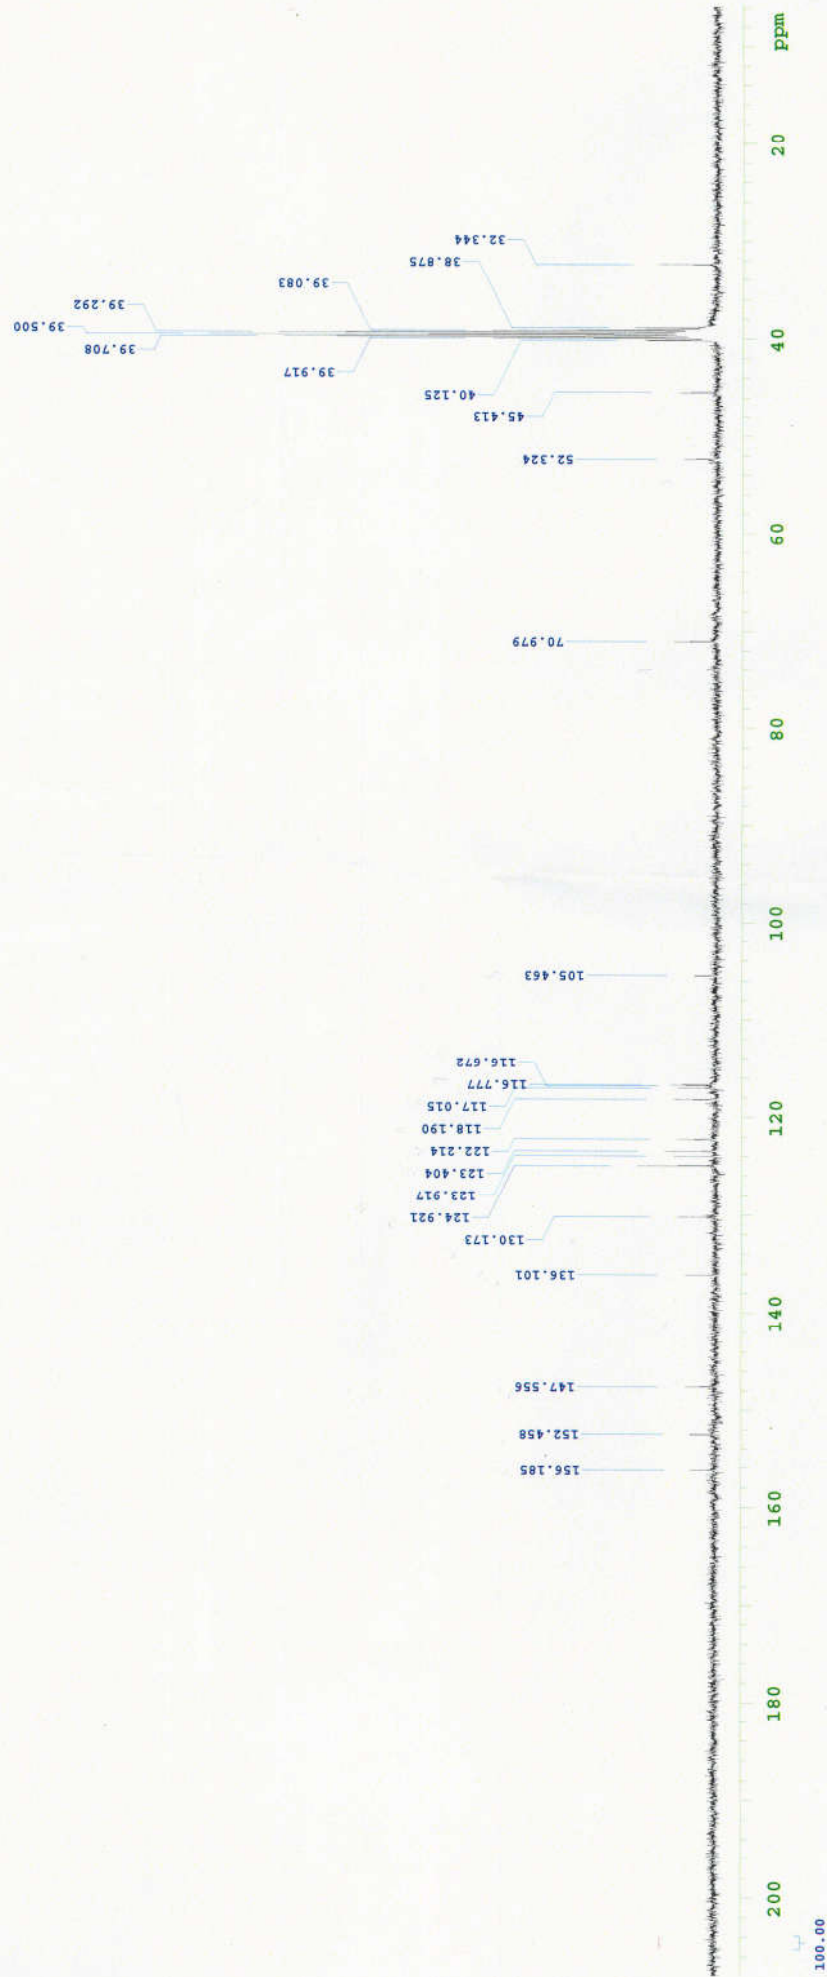

|                                                                                                                                                                                              |                                                                                                                                                                    |                                                                                                                                                                     |                                                                                                                                  |
|----------------------------------------------------------------------------------------------------------------------------------------------------------------------------------------------|--------------------------------------------------------------------------------------------------------------------------------------------------------------------|---------------------------------------------------------------------------------------------------------------------------------------------------------------------|----------------------------------------------------------------------------------------------------------------------------------|
| <p><b>PULSE SEQUENCE</b><br/>         Relax. delay 0.700 sec<br/>         Pulse 45.0 degrees<br/>         Acq. time 1.300 sec<br/>         Width 24509.8 Hz<br/>         512 repetitions</p> | <p><b>OBSERVE C13, 100-5578731</b><br/>         DECOUPLE H1, 399.9134917<br/>         Power 42 dB<br/>         continuously on<br/>         WALTZ-16 modulated</p> | <p><b>DATA PROCESSING</b><br/>         Line broadening 1.0 Hz<br/>         FT size 65536<br/>         Total time 17 minutes</p>                                     | <p><b>Solvent: dmsc</b><br/>         Ambient temperature<br/>         Operator: walkup<br/>         VNMRS-400 *Varian-400MR*</p> |
| <p>sh575 c13<br/>         File: exp<br/>         Pulse Sequence: s2pul</p>                                                                                                                   |                                                                                                                                                                    | <p>Handwritten chemical structure of a complex molecule with a benzene ring, a nitrogen atom, and a methyl group. The structure is labeled with 'CH3' and 'NH'.</p> | <p>Handwritten '2x' next to the chemical structure.</p>                                                                          |

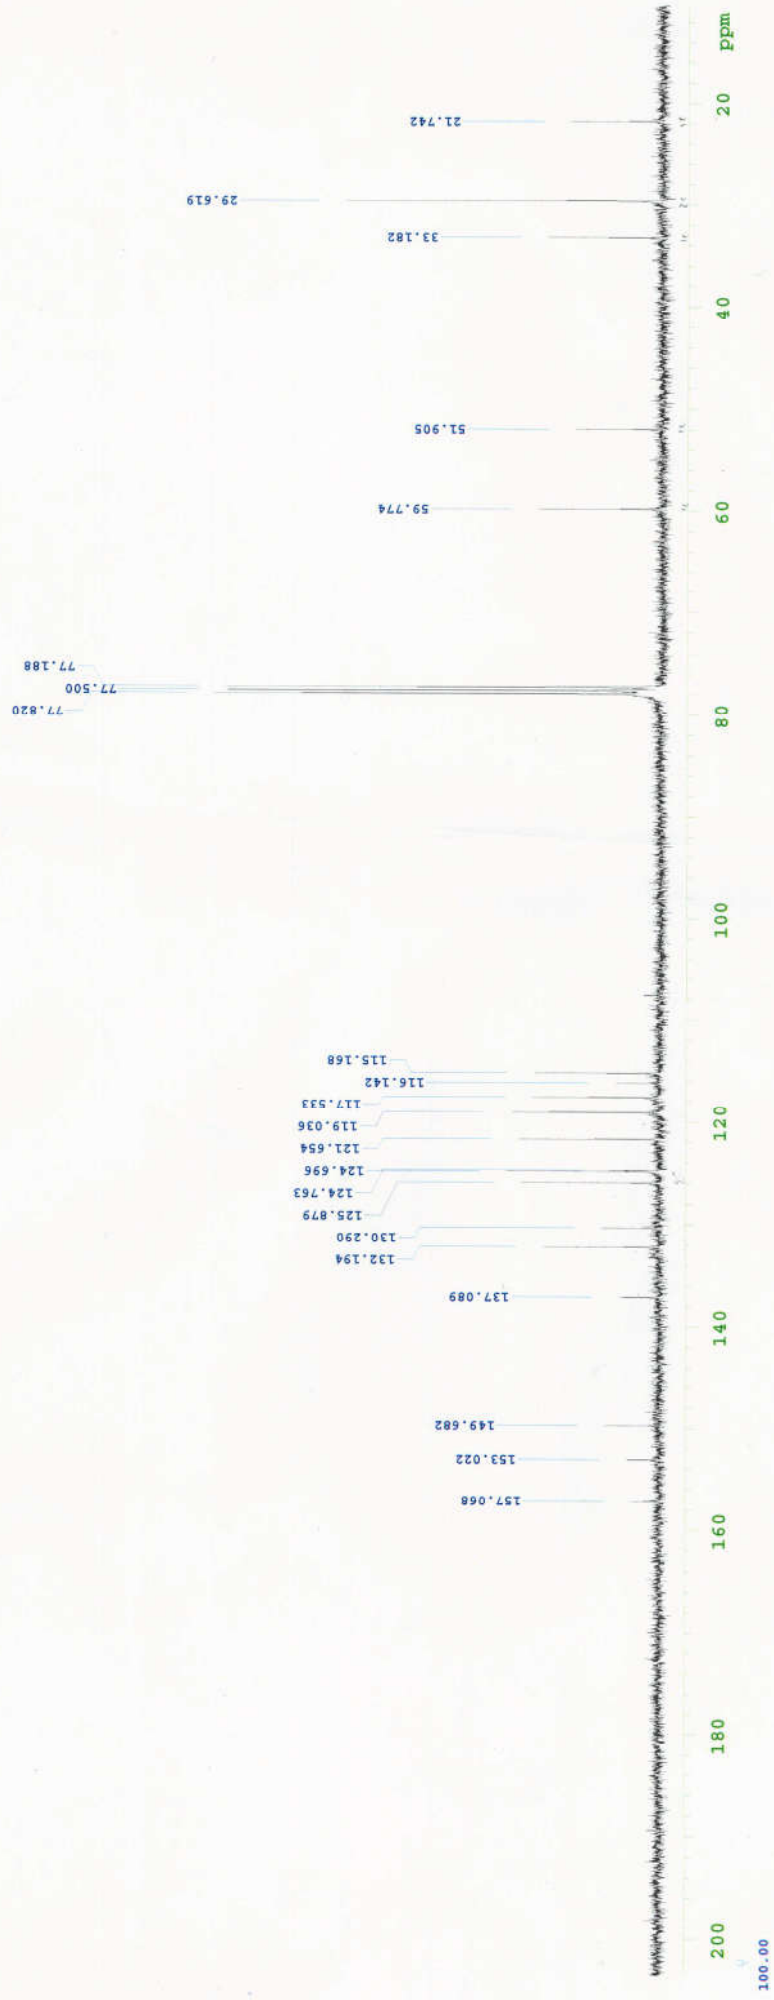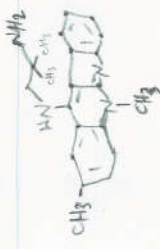

Solvent: cdcl3  
Ambient temperature  
Operator: walkup  
VMMS-400 -Varian-400MR\*

sh 569 c 13  
File: exp  
Pulse Sequence: s2pul

DATA PROCESSING  
Line broadening 1.0 Hz  
PT size 65536  
Total time 33 minutes

OBSERVE C13, 100.5572969  
DECOUPLE H1, 399.9115921  
Power 42 dB  
continuously on  
WALTZ-16 modulated

PULSE SEQUENCE  
Relax. delay 0.700 sec  
Pulse 45.0 degrees  
Acq. time 1.300 sec  
Width 24509.8 Hz  
1000 repetitions

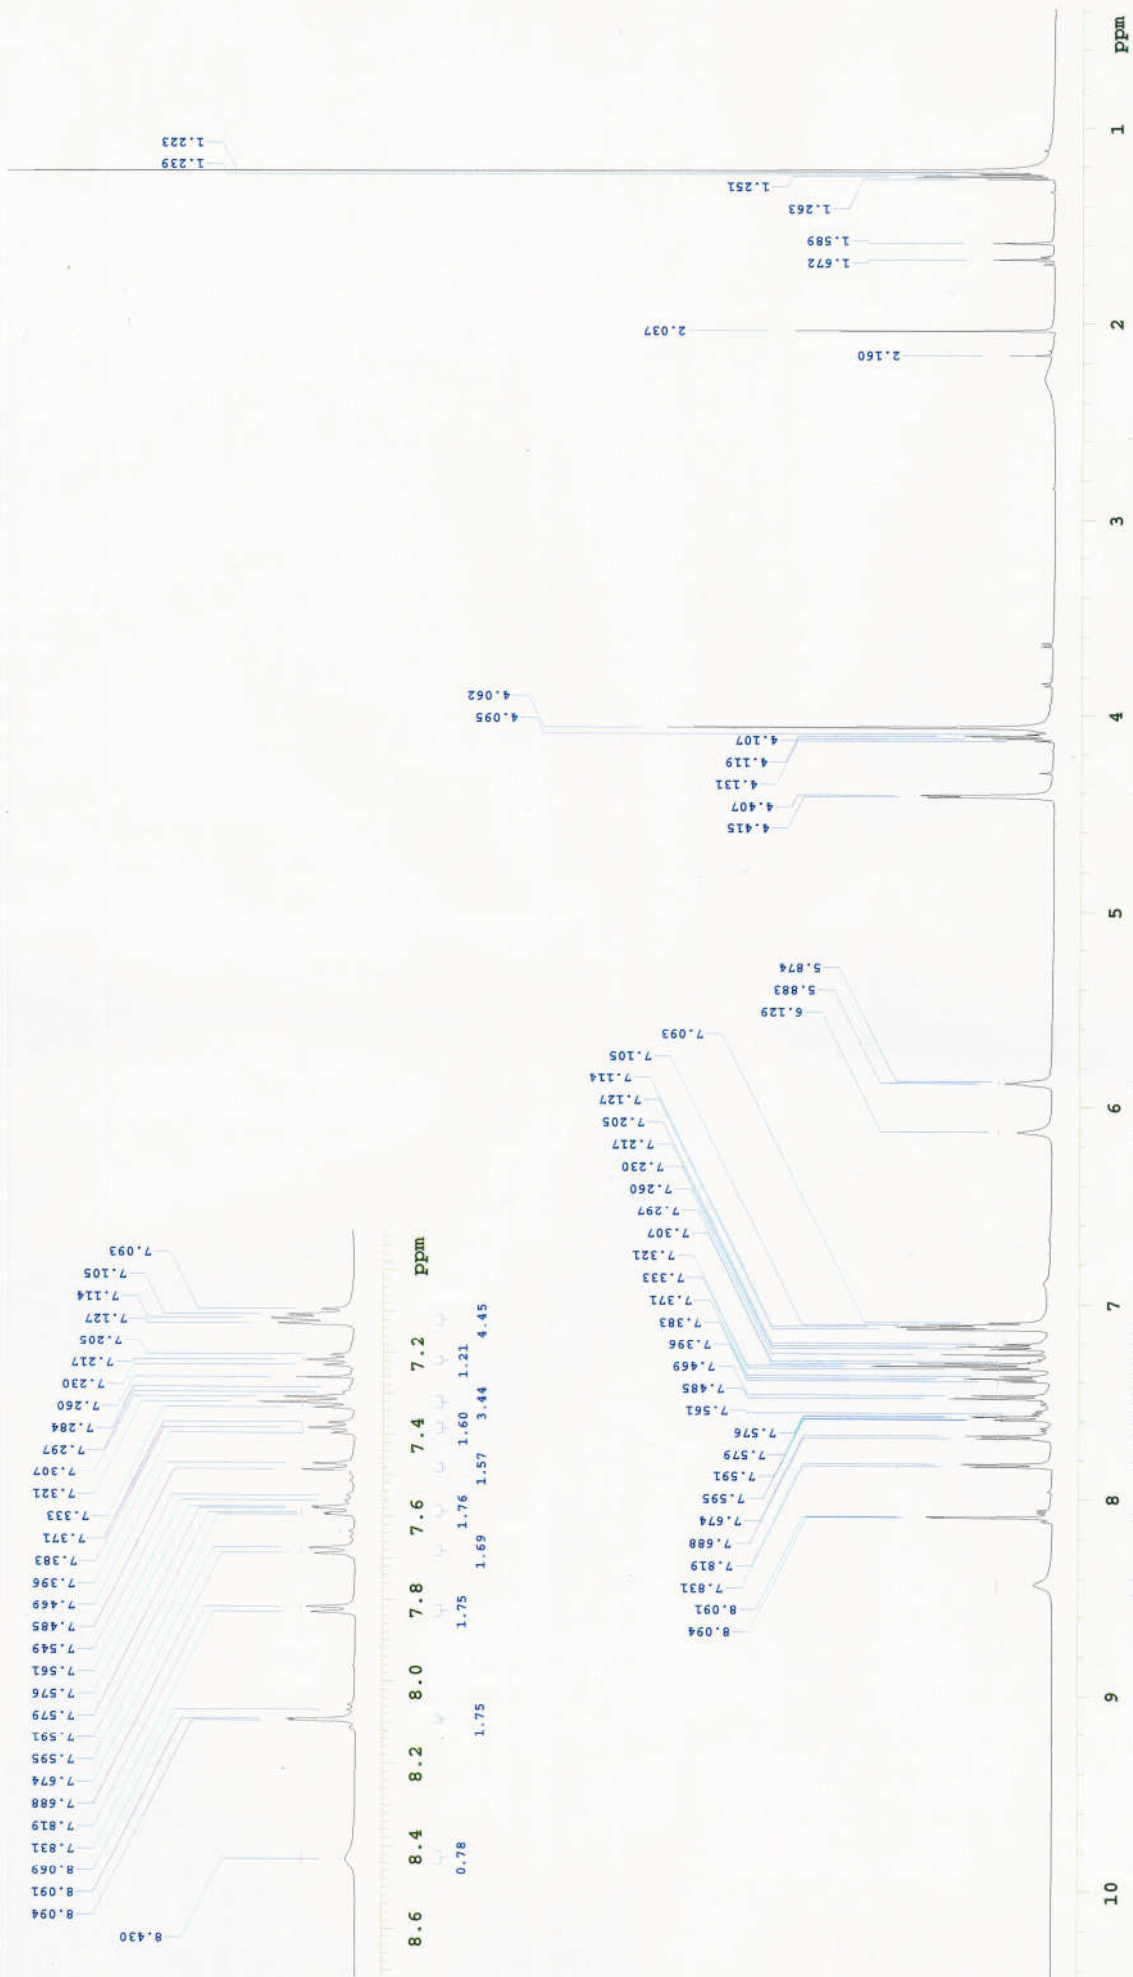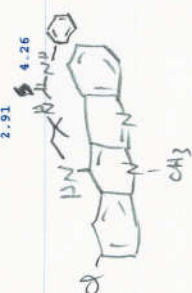

|                                                                                                                                                       |                               |                                                                                                      |                                                                                                      |
|-------------------------------------------------------------------------------------------------------------------------------------------------------|-------------------------------|------------------------------------------------------------------------------------------------------|------------------------------------------------------------------------------------------------------|
| <p>PULSE SEQUENCE</p> <p>Relax. delay 1.592 sec</p> <p>Pulse 45.0 degrees</p> <p>Acq. time 3.408 sec</p> <p>Width 9615.4 Hz</p> <p>16 repetitions</p> | <p>OBSERVE H1. 599.771258</p> | <p>DATA PROCESSING</p> <p>Line broadening 0.3 Hz</p> <p>PT size 65536</p> <p>Total time 1 minute</p> | <p>Solvent: cdcl3</p> <p>Ambient temperature</p> <p>Operator: walkup</p> <p>VMMS-600 "varian600"</p> |
|                                                                                                                                                       |                               |                                                                                                      | <p>sh 574</p>                                                                                        |
|                                                                                                                                                       |                               |                                                                                                      | <p>Pulse sequence: s2pul</p>                                                                         |

File: Data not saved yet

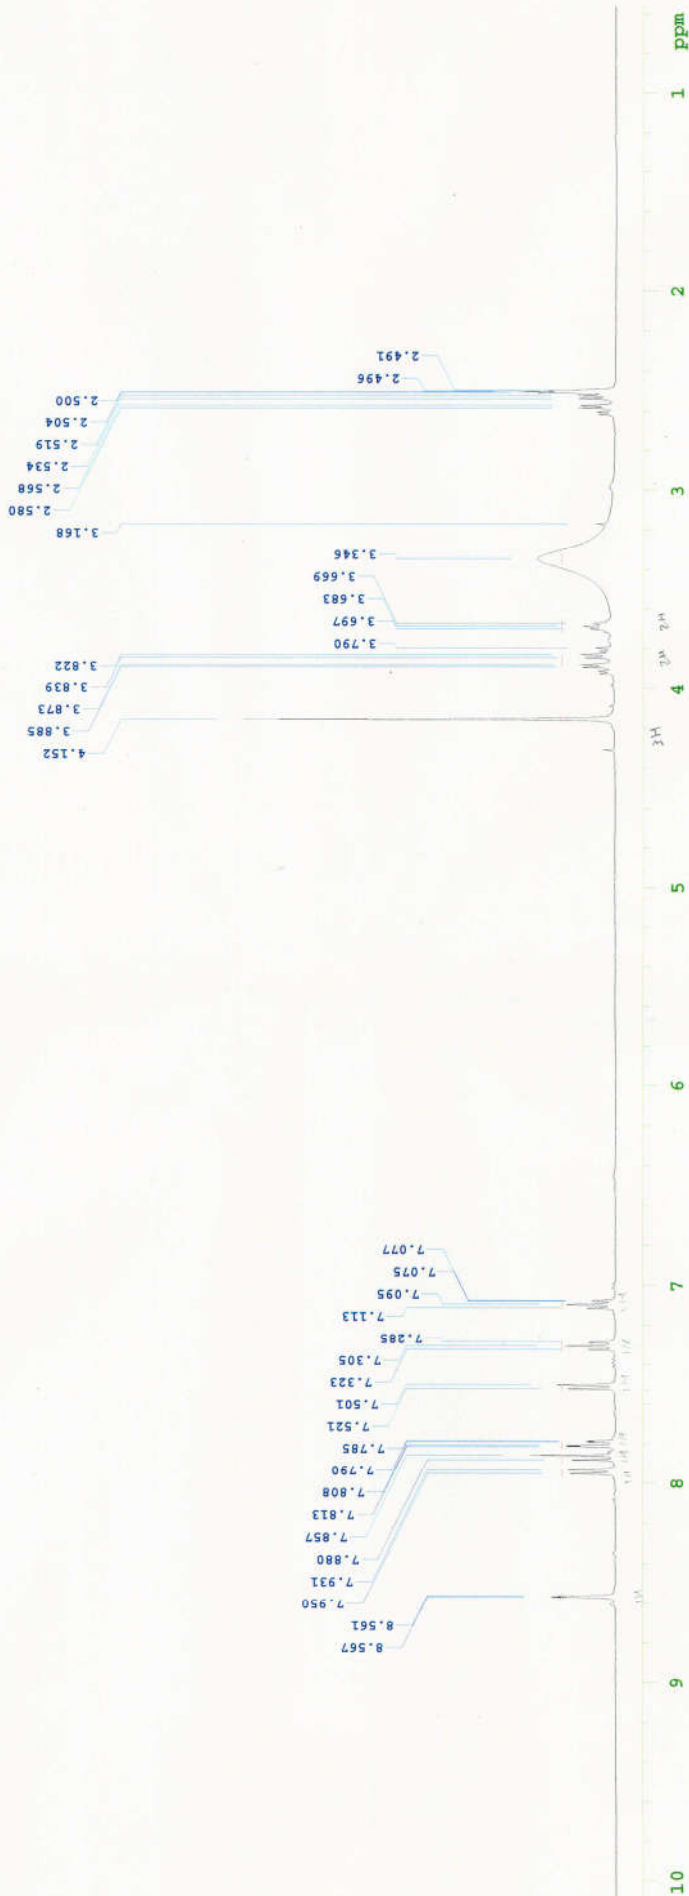

**PULSE SEQUENCE**  
Relax. delay 1.500 sec  
Pulse 45.0 degrees  
Acq. time 3.500 sec  
Width 6410.3 Hz  
16 repetitions

**OBSERVE** H1, 399.9114849

**DATA PROCESSING**  
Line broadening 0.2 Hz  
FT size 65516  
Total time 1 minute

**Solvent:** dmsc  
**Ambient temperature**  
**Operator:** walkup  
**VMMS-400** \*Varian-400MR\*

sh 599 584  
File: exp  
Pulse Sequence: s2pul

2H

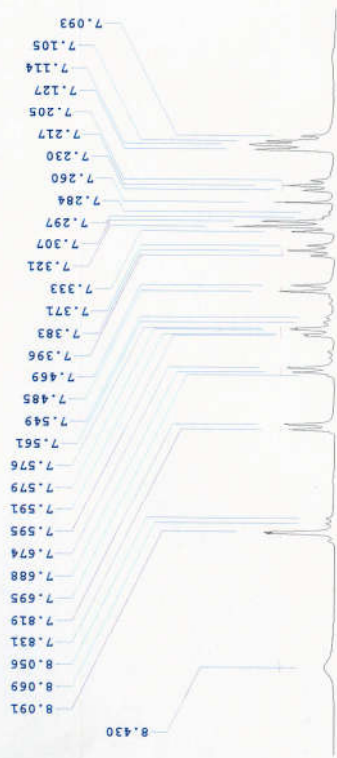

8.6 8.4 8.2 8.0 7.8 7.6 7.4 7.2 7.0 ppm

1.223  
1.239

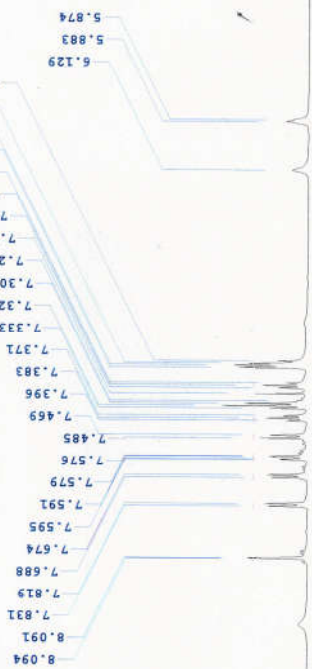

10 9 8 7 6 5 4 3 2 1 ppm

|                                                                                                                                                                                            |                                                                                                                |                                                                                                                               |                                                                                                                            |               |
|--------------------------------------------------------------------------------------------------------------------------------------------------------------------------------------------|----------------------------------------------------------------------------------------------------------------|-------------------------------------------------------------------------------------------------------------------------------|----------------------------------------------------------------------------------------------------------------------------|---------------|
| <p><b>PULSE SEQUENCE</b><br/>         Relax. delay 1.592 sec<br/>         Pulse 45.0 degrees<br/>         Acq. time 3.408 sec<br/>         Width 9615.4 Hz<br/>         16 repetitions</p> | <p><b>OBSERVE</b> H1, 599.7712258<br/>         1.33 1.37 1.52 3.30 3.95<br/>         1.33 1.511 1.111 1.17</p> | <p><b>DATA PROCESSING</b><br/>         Line broadening 0.3 Hz<br/>         FT size 65836<br/>         Total time 1 minute</p> | <p><b>Solvent:</b> cdcl3<br/> <b>Ambient temperature</b><br/> <b>Operator:</b> walkup<br/> <b>VMMS-600 *varian600*</b></p> | <p>sh 574</p> |
|--------------------------------------------------------------------------------------------------------------------------------------------------------------------------------------------|----------------------------------------------------------------------------------------------------------------|-------------------------------------------------------------------------------------------------------------------------------|----------------------------------------------------------------------------------------------------------------------------|---------------|

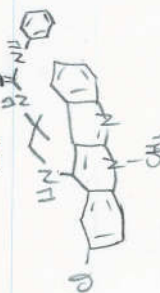

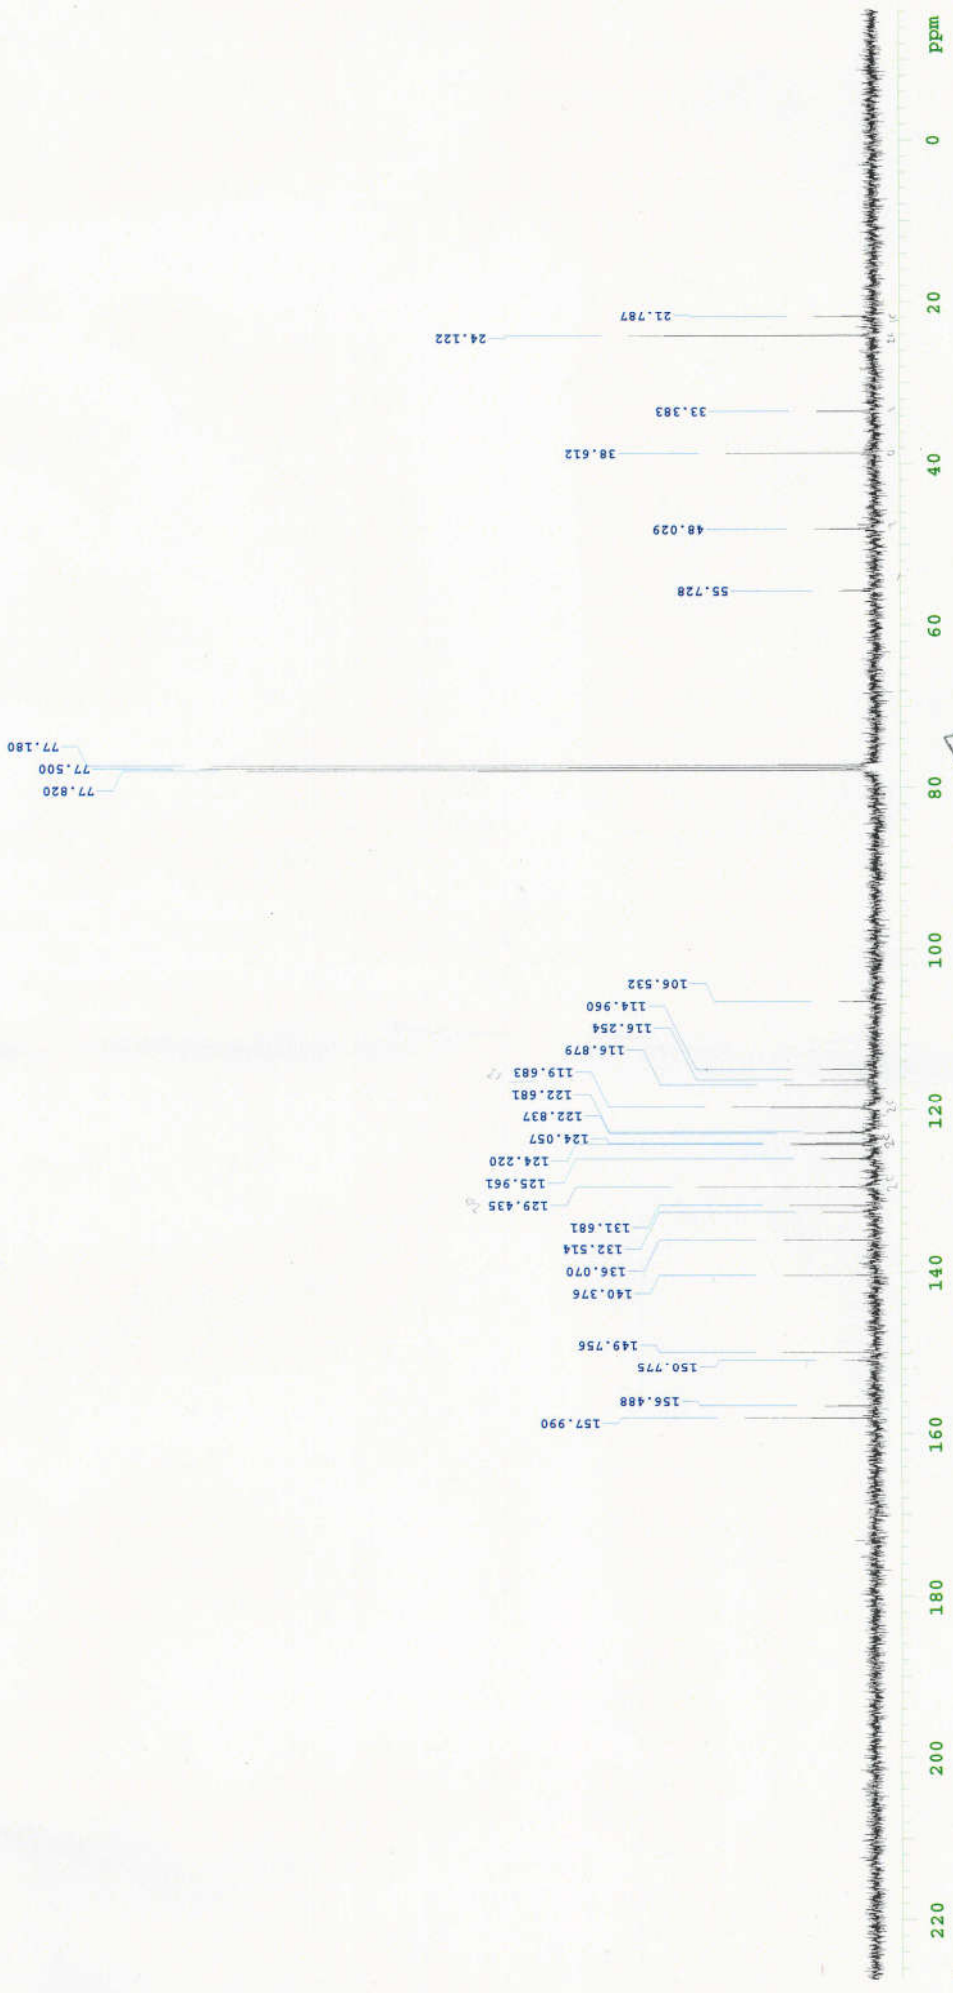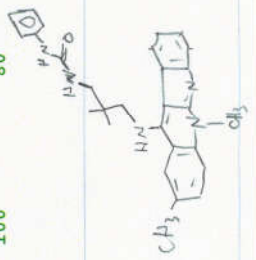

|                                                                                                                                                                                             |                                                                                                                                                             |                                                                                                                                 |                                                                                                                            |                                                                             |
|---------------------------------------------------------------------------------------------------------------------------------------------------------------------------------------------|-------------------------------------------------------------------------------------------------------------------------------------------------------------|---------------------------------------------------------------------------------------------------------------------------------|----------------------------------------------------------------------------------------------------------------------------|-----------------------------------------------------------------------------|
| <p><b>PULSE SEQUENCE</b><br/>         Relax delay 0.700 sec<br/>         Pulse 45.0 degrees<br/>         Acq. time 1.300 sec<br/>         Width 24509.8 Hz<br/>         512 repetitions</p> | <p>OBSERVE C13, 100.5573007<br/>         DECOUPLE H1, 399.9115921<br/>         Power 42 dB<br/>         continuously on<br/>         WALTZ-16 modulated</p> | <p><b>DATA PROCESSING</b><br/>         Line broadening 1.0 Hz<br/>         FT size 65536<br/>         Total time 17 minutes</p> | <p>Solvent: cdcl3<br/>         Ambient temperature<br/>         Operator: walkup<br/>         VNMRS-400 "Varian-400MR"</p> | <p>sh 557.c13<br/>         File: exp<br/>         Pulse Sequence: s2pul</p> |
|---------------------------------------------------------------------------------------------------------------------------------------------------------------------------------------------|-------------------------------------------------------------------------------------------------------------------------------------------------------------|---------------------------------------------------------------------------------------------------------------------------------|----------------------------------------------------------------------------------------------------------------------------|-----------------------------------------------------------------------------|

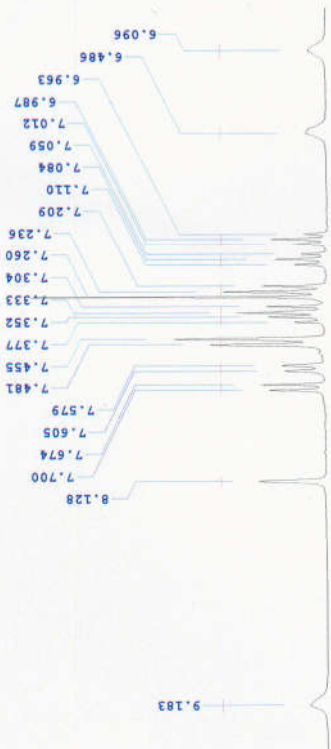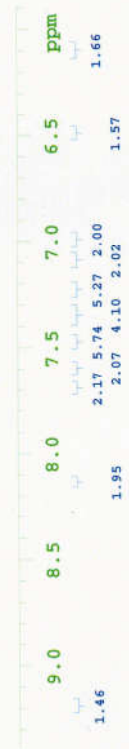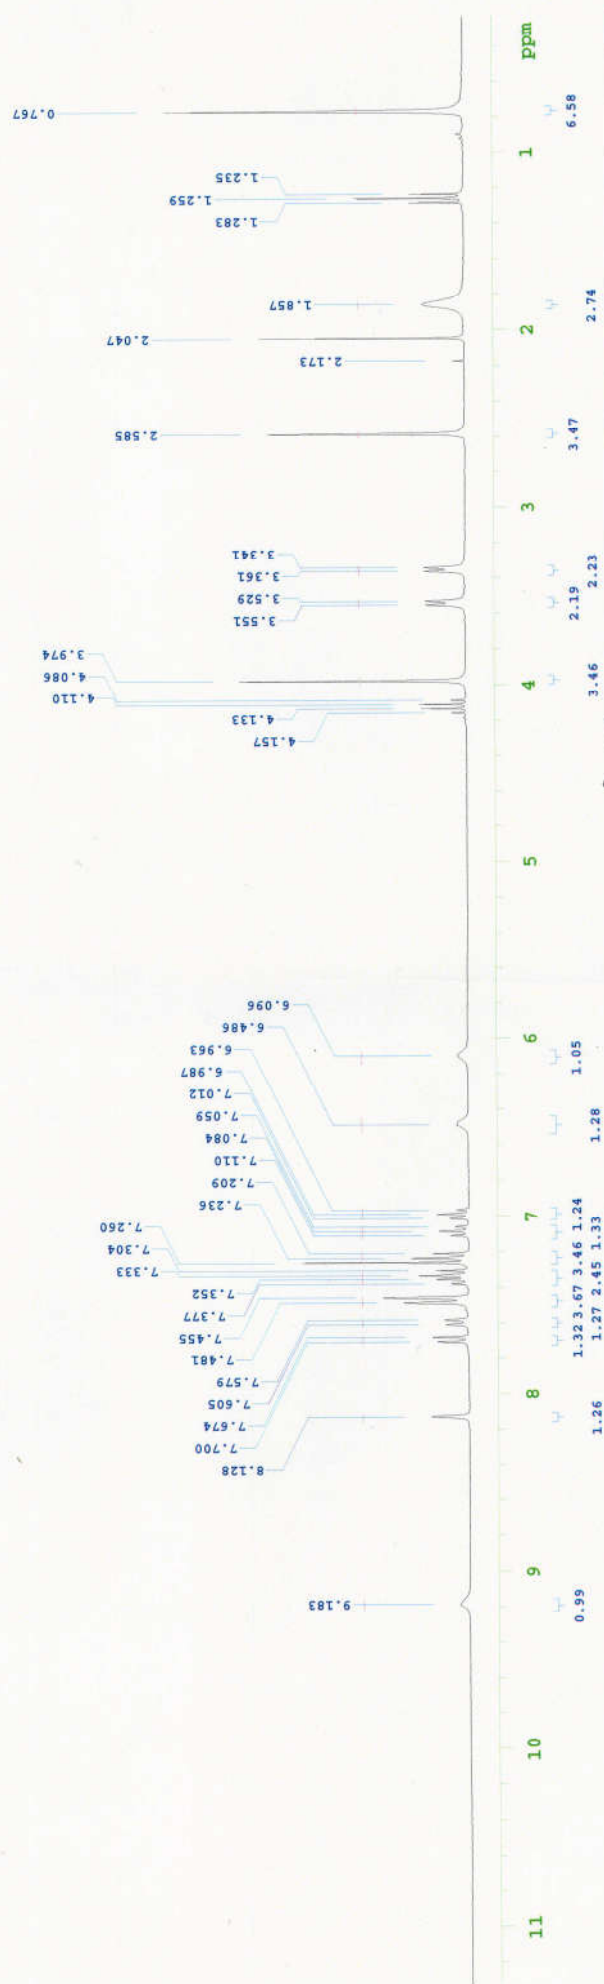

| ppm | Integration | Chemical Shift (ppm) | Integration | Chemical Shift (ppm) | Integration | Chemical Shift (ppm) | Integration | Chemical Shift (ppm) | Integration | Chemical Shift (ppm) | Integration | Chemical Shift (ppm) | Integration |
|-----|-------------|----------------------|-------------|----------------------|-------------|----------------------|-------------|----------------------|-------------|----------------------|-------------|----------------------|-------------|
| 11  | 0.99        | 9.183                | 8           | 1.26                 | 7.700       | 7                    | 1.32        | 7.236                | 6           | 1.05                 | 5           | 3.46                 | 4.110       |
| 10  | 1.26        | 7.674                | 7           | 1.28                 | 7.209       | 6                    | 1.28        | 7.110                | 5           | 2.19                 | 4           | 2.23                 | 4.133       |
| 9   | 1.32        | 7.605                | 7           | 1.33                 | 7.084       | 6                    | 1.28        | 7.059                | 5           | 2.23                 | 3           | 3.47                 | 3.974       |
| 8   | 1.26        | 7.579                | 7           | 1.28                 | 7.012       | 6                    | 1.28        | 7.012                | 5           | 2.23                 | 3           | 3.47                 | 3.551       |
| 7   | 1.32        | 7.481                | 7           | 1.28                 | 7.059       | 6                    | 1.28        | 7.059                | 5           | 2.23                 | 3           | 3.47                 | 3.529       |
| 6   | 1.32        | 7.455                | 7           | 1.28                 | 7.084       | 6                    | 1.28        | 7.084                | 5           | 2.23                 | 3           | 3.47                 | 3.361       |
| 5   | 1.32        | 7.377                | 7           | 1.28                 | 7.110       | 6                    | 1.28        | 7.110                | 5           | 2.23                 | 3           | 3.47                 | 3.341       |
| 4   | 1.32        | 7.352                | 7           | 1.28                 | 7.209       | 6                    | 1.28        | 7.209                | 5           | 2.23                 | 3           | 3.47                 | 2.585       |
| 3   | 1.32        | 7.304                | 7           | 1.28                 | 7.236       | 6                    | 1.28        | 7.236                | 5           | 2.23                 | 3           | 3.47                 | 2.173       |
| 2   | 1.32        | 7.260                | 7           | 1.28                 | 7.236       | 6                    | 1.28        | 7.236                | 5           | 2.23                 | 3           | 3.47                 | 2.047       |
| 1   | 1.32        | 7.333                | 7           | 1.28                 | 7.333       | 6                    | 1.28        | 7.333                | 5           | 2.23                 | 3           | 3.47                 | 1.857       |
| 0   | 1.32        | 7.304                | 7           | 1.28                 | 7.304       | 6                    | 1.28        | 7.304                | 5           | 2.23                 | 3           | 3.47                 | 1.283       |
|     | 1.32        | 7.377                | 7           | 1.28                 | 7.377       | 6                    | 1.28        | 7.377                | 5           | 2.23                 | 3           | 3.47                 | 1.235       |
|     | 1.32        | 7.455                | 7           | 1.28                 | 7.455       | 6                    | 1.28        | 7.455                | 5           | 2.23                 | 3           | 3.47                 | 1.259       |
|     | 1.32        | 7.579                | 7           | 1.28                 | 7.579       | 6                    | 1.28        | 7.579                | 5           | 2.23                 | 3           | 3.47                 | 0.767       |
|     | 1.32        | 7.674                | 7           | 1.28                 | 7.674       | 6                    | 1.28        | 7.674                | 5           | 2.23                 | 3           | 3.47                 |             |
|     | 1.32        | 7.700                | 7           | 1.28                 | 7.700       | 6                    | 1.28        | 7.700                | 5           | 2.23                 | 3           | 3.47                 |             |
|     | 1.32        | 7.874                | 7           | 1.28                 | 7.874       | 6                    | 1.28        | 7.874                | 5           | 2.23                 | 3           | 3.47                 |             |
|     | 1.32        | 7.963                | 7           | 1.28                 | 7.963       | 6                    | 1.28        | 7.963                | 5           | 2.23                 | 3           | 3.47                 |             |
|     | 1.32        | 8.096                | 7           | 1.28                 | 8.096       | 6                    | 1.28        | 8.096                | 5           | 2.23                 | 3           | 3.47                 |             |

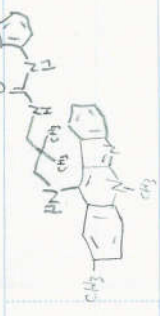

Solvent: cdcl3  
 Ambient temperature  
 Operator: walkup  
 Mercury-300 "Varian-NMR"  
 sh 557  
 File: exp  
 Pulse Sequence: s2pul



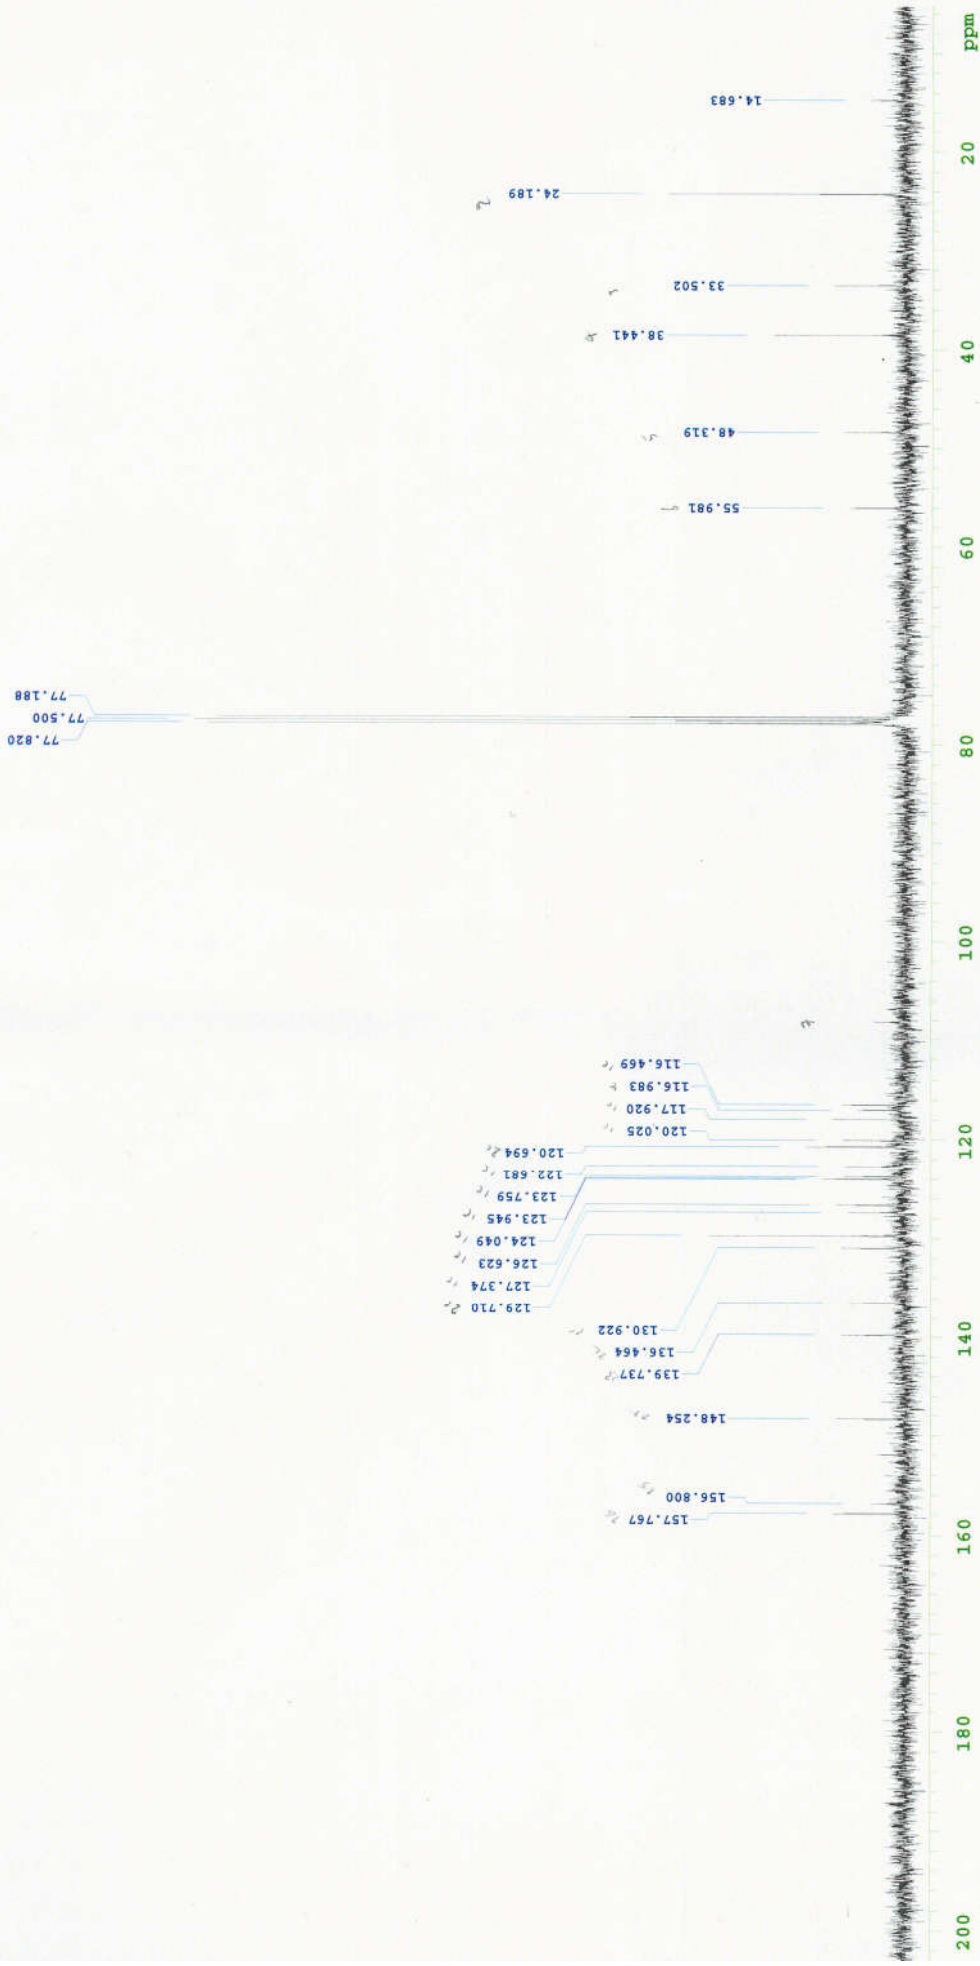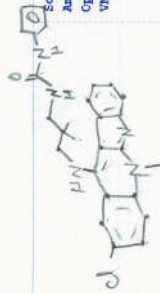

|                                                                                                                                            |                                                                                                                             |                                                                                                  |                                                                                                    |                                                           |
|--------------------------------------------------------------------------------------------------------------------------------------------|-----------------------------------------------------------------------------------------------------------------------------|--------------------------------------------------------------------------------------------------|----------------------------------------------------------------------------------------------------|-----------------------------------------------------------|
| <p>LSR SEQUENCE<br/> relax. delay 0.700 sec<br/> pulse 45.0 degrees<br/> acq. time 1.300 sec<br/> fidh 24509.8 Hz<br/> 112 repetitions</p> | <p>OBSERVE C13, 100.5572962<br/> DECOUPLE H1, 399.9115921<br/> Power 42 dB<br/> continuously on<br/> WALTZ-16 modulated</p> | <p>DATA PROCESSING<br/> Line broadening 1.0 Hz<br/> FT size 65536<br/> Total time 17 minutes</p> | <p>Solvent: cdcl3<br/> Ambient temperature<br/> Operator: walkup<br/> VNMRS-400 *varian-400MR*</p> | <p>sh563c13<br/> File: exp<br/> Pulse Sequence: s2pul</p> |
|--------------------------------------------------------------------------------------------------------------------------------------------|-----------------------------------------------------------------------------------------------------------------------------|--------------------------------------------------------------------------------------------------|----------------------------------------------------------------------------------------------------|-----------------------------------------------------------|

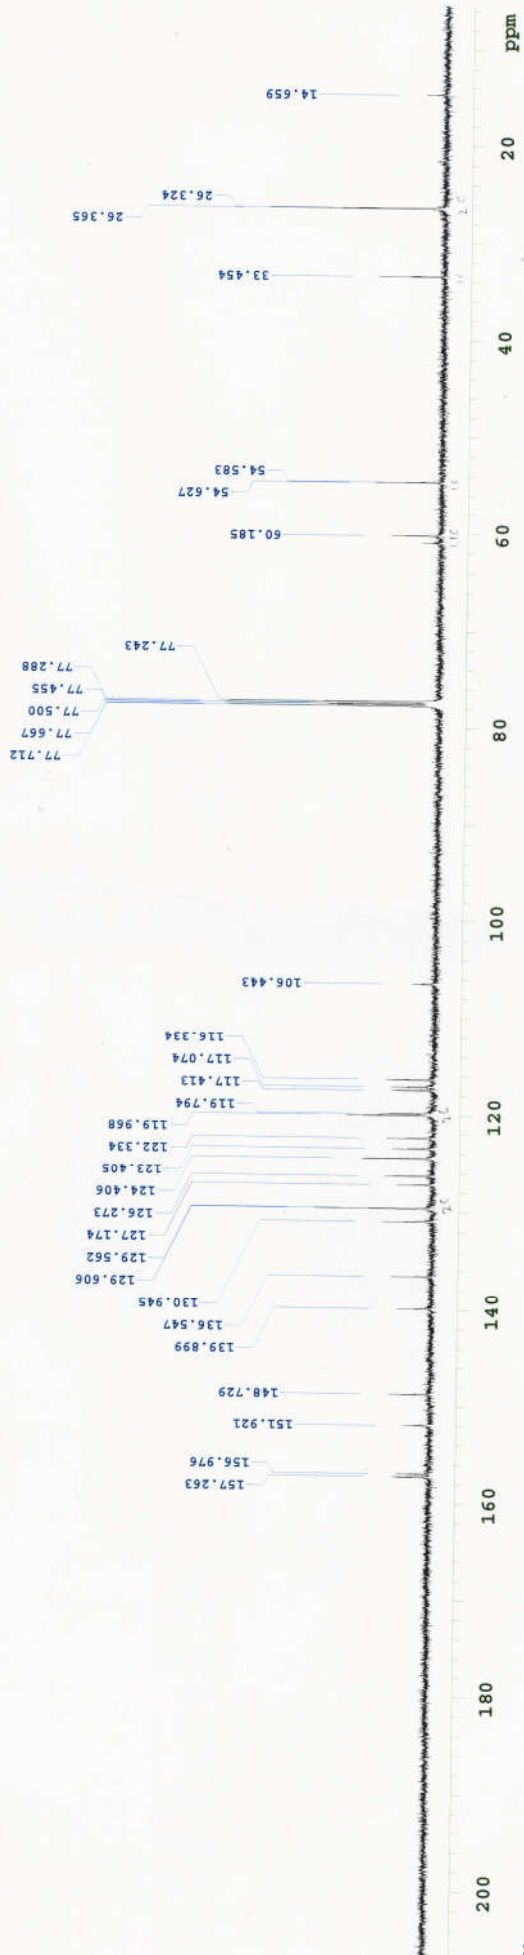

|                                                                                                                     |                                                                                                              |                                                                                      |                                                                                    |            |
|---------------------------------------------------------------------------------------------------------------------|--------------------------------------------------------------------------------------------------------------|--------------------------------------------------------------------------------------|------------------------------------------------------------------------------------|------------|
| .SE SEQUENCE<br>relax. delay 0.700 sec<br>tilt 45.0 degrees<br>q. time 1.300 sec<br>dth 36764.7 Hz<br>2 repetitions | OBSERVE C13, 150.8125237<br>DECOUPLE H1, 599.7742324<br>Power 40 dB<br>continuously on<br>WALTZ-16 modulated | DATA PROCESSING<br>Line broadening 1.0 Hz<br>FT size 131072<br>Total time 17 minutes | Solvent: cdcl3<br>Ambient temperature<br>Operator: walkup<br>VMMS-600 "variant600" | sh 573 c13 |
|---------------------------------------------------------------------------------------------------------------------|--------------------------------------------------------------------------------------------------------------|--------------------------------------------------------------------------------------|------------------------------------------------------------------------------------|------------|

e: Data not saved yet

File sequence: s2pul

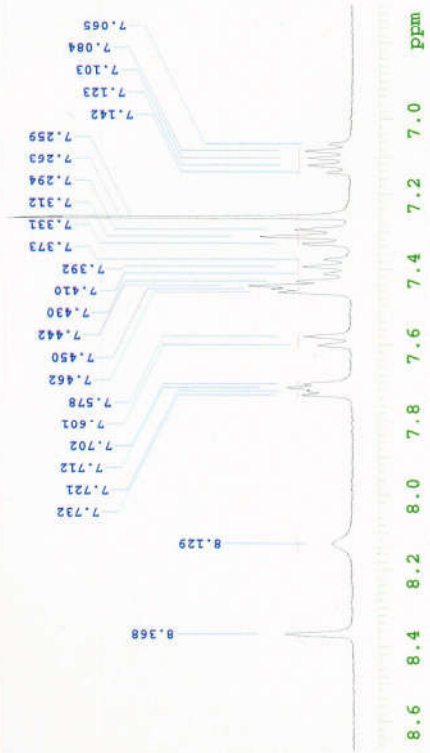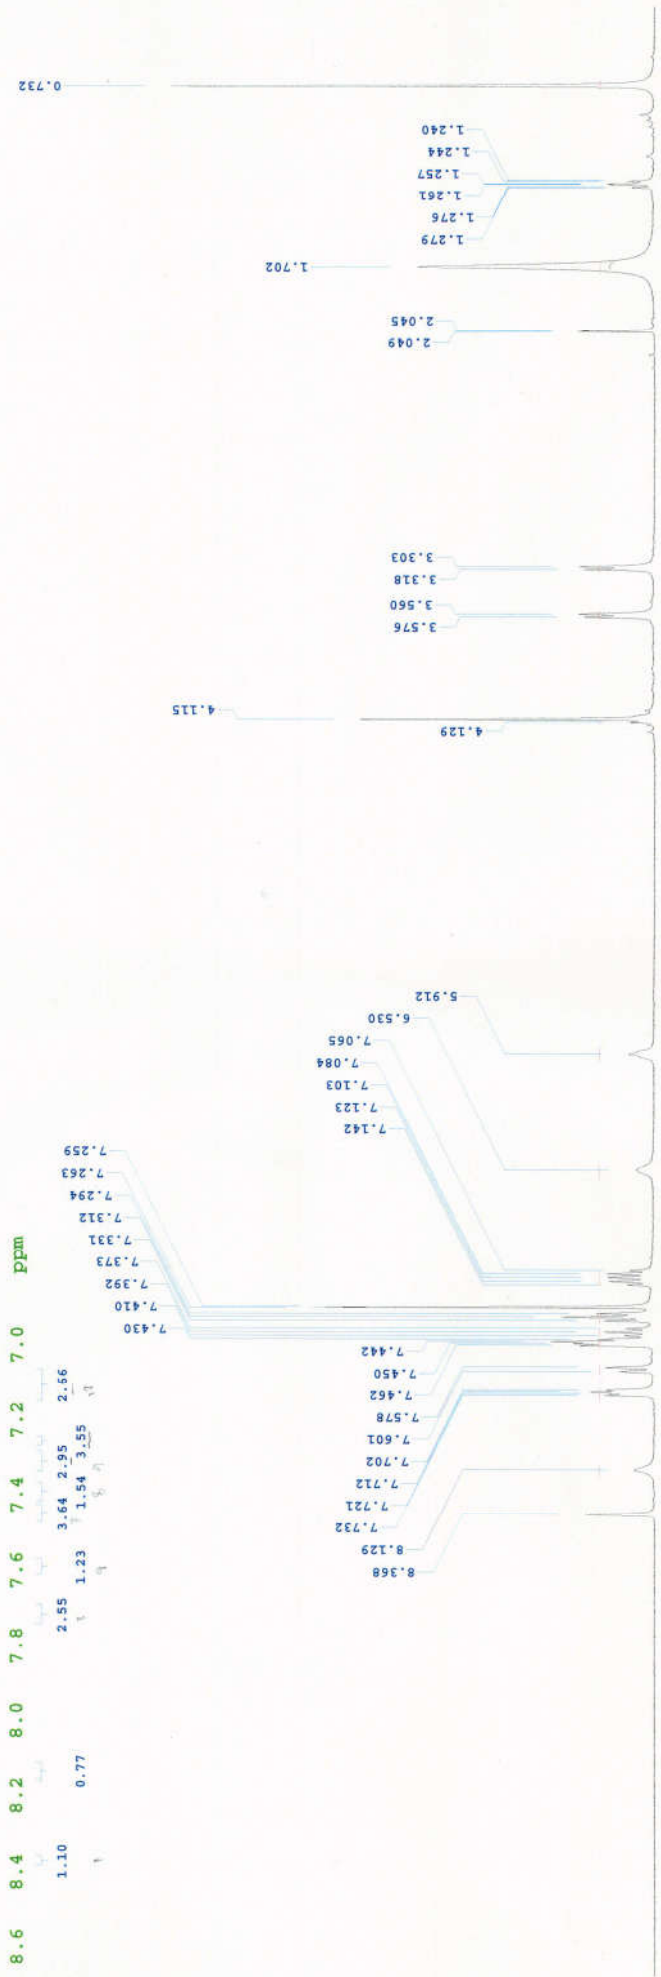

| ppm | Integration |
|-----|-------------|
| 10  |             |
| 9   |             |
| 8   | 0.95        |
| 7   | 0.72        |
| 6   | 2.05        |
| 5   | 3.12        |
| 4   | 2.25        |
| 3   | 2.04        |
| 2   | 2.08        |
| 1   | 7.88        |
| 0   | 6.26        |

**PULSER SEQUENCE**  
 Relax. delay 1.500 sec  
 Pulse 45.0 degrees  
 Acq. time 3.500 sec  
 Width 6410.3 Hz  
 16 repetitions

OBSERVE RL, 399.905925

**DATA PROCESSING**  
 Line broadening 0.2 Hz  
 FT size 6536  
 Total time 1 minute

Solvent: cdcl3  
 Ambient temperature  
 Operator: walkup  
 VNMR5-400 \*Varian-400MR\*

shaban 563  
 File: exp  
 Pulse Sequence: s2pul

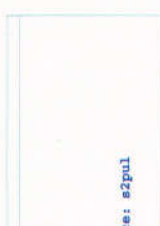

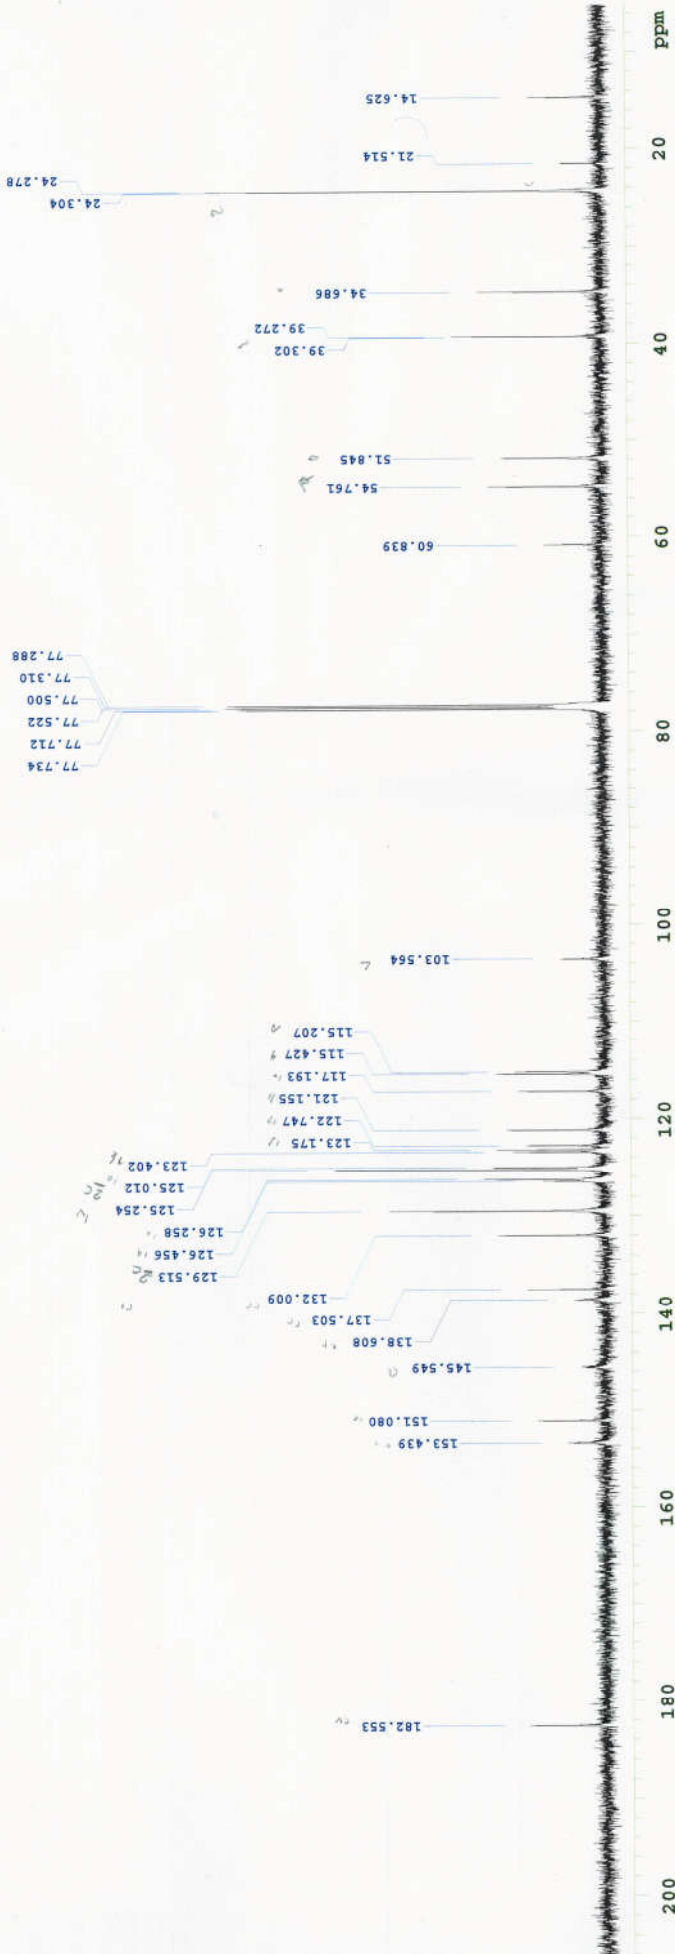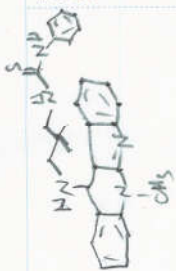

|                                                                                                                                                        |                                                                                                                                     |                                                                                                         |                                                                                                       |                   |
|--------------------------------------------------------------------------------------------------------------------------------------------------------|-------------------------------------------------------------------------------------------------------------------------------------|---------------------------------------------------------------------------------------------------------|-------------------------------------------------------------------------------------------------------|-------------------|
| <p>USER SEQUENCE</p> <p>Relax. delay 0.700 sec</p> <p>Pulse 45.0 degrees</p> <p>Acq. time 1.300 sec</p> <p>Width 36764.7 Hz</p> <p>512 repetitions</p> | <p>OBSERVE C13, 150.8125282</p> <p>DECOUPLE H1, 599.7742324</p> <p>Power 40 dB</p> <p>continuously on</p> <p>WALTZ-16 modulated</p> | <p>DATA PROCESSING</p> <p>Line broadening 1.0 Hz</p> <p>FT size 131072</p> <p>Total time 17 minutes</p> | <p>Solvent: cdcl3</p> <p>Ambient temperature</p> <p>Operator: walkup</p> <p>YNMR5-600 "varian600"</p> | <p>sh 564 c13</p> |
|--------------------------------------------------------------------------------------------------------------------------------------------------------|-------------------------------------------------------------------------------------------------------------------------------------|---------------------------------------------------------------------------------------------------------|-------------------------------------------------------------------------------------------------------|-------------------|

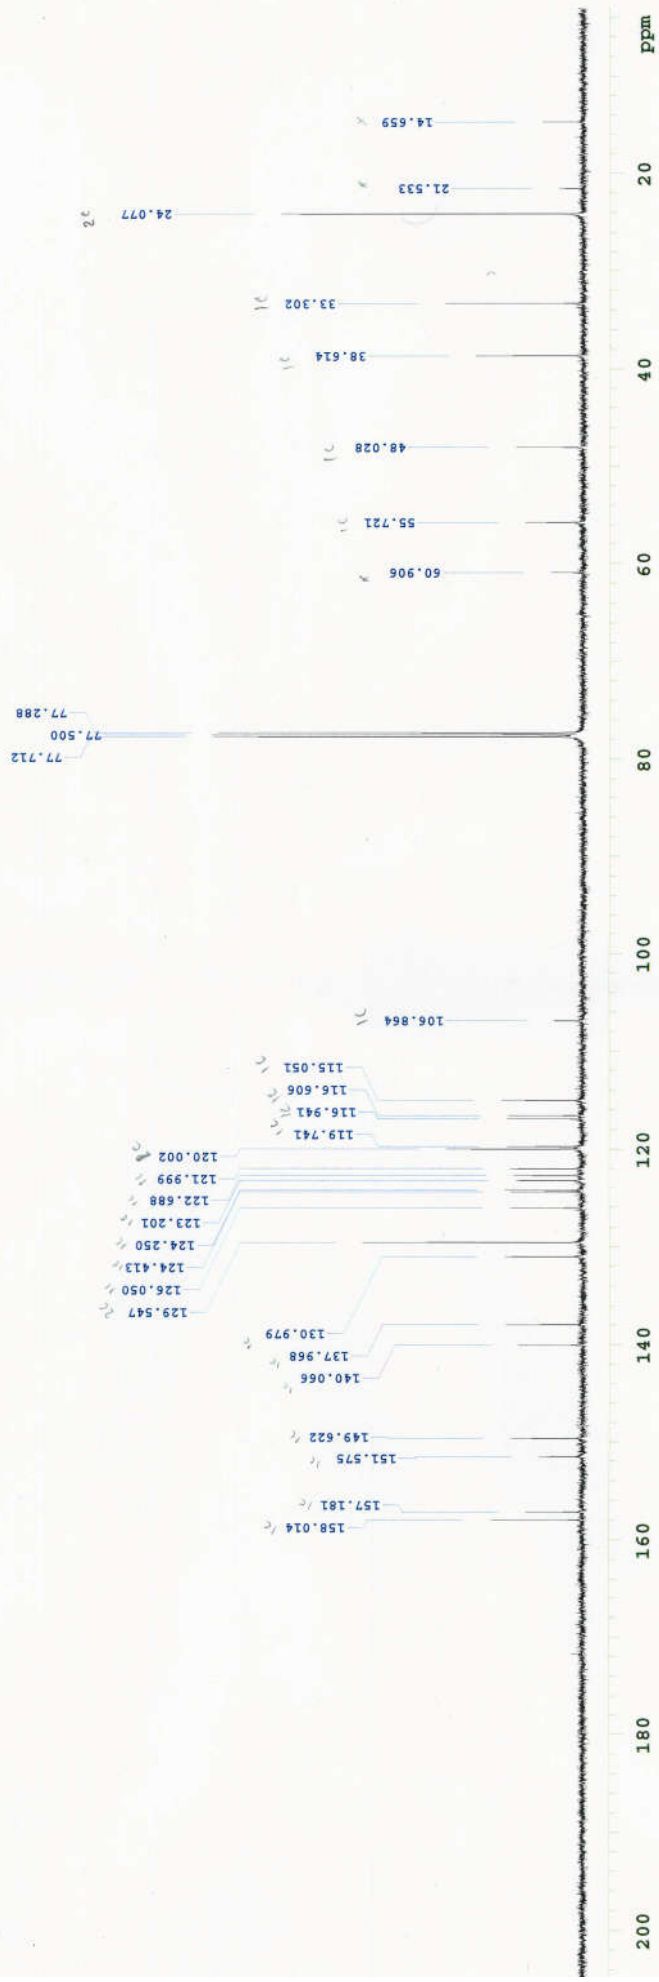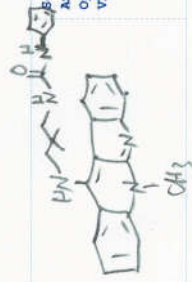

|                                                                                                                                          |                                                                                                                         |                                                                                                |                                                                                              |                   |
|------------------------------------------------------------------------------------------------------------------------------------------|-------------------------------------------------------------------------------------------------------------------------|------------------------------------------------------------------------------------------------|----------------------------------------------------------------------------------------------|-------------------|
| <p>PULSE SEQUENCE<br/>Relax. delay 0.700 sec<br/>Pulse 45.0 degrees<br/>Acq. time 1.300 sec<br/>Width 36764.7 Hz<br/>512 repetitions</p> | <p>OBSERVE C13, 150.8125343<br/>DECOUPLE H1, 599.7742124<br/>power 40 dB<br/>continuously on<br/>WALTZ-16 modulated</p> | <p>DATA PROCESSING<br/>Line broadening 1.0 Hz<br/>FT size 131072<br/>Total time 17 minutes</p> | <p>Solvent: cdcl3<br/>Ambient temperature<br/>Operator: walkup<br/>VNMR5-600 "varian600"</p> | <p>sh 562 c13</p> |
|------------------------------------------------------------------------------------------------------------------------------------------|-------------------------------------------------------------------------------------------------------------------------|------------------------------------------------------------------------------------------------|----------------------------------------------------------------------------------------------|-------------------|

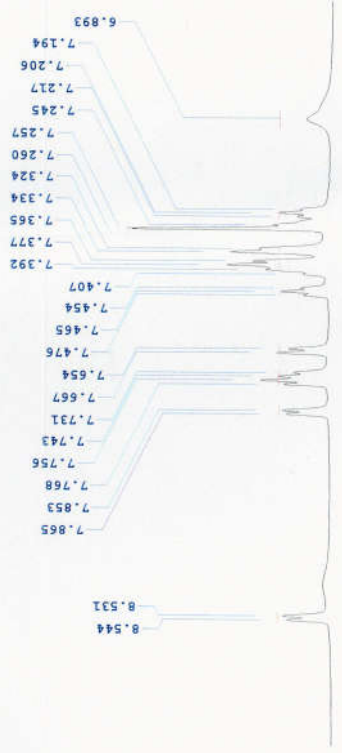

8.8 8.6 8.4 8.2 8.0 7.8 7.6 7.4 7.2 7.0 6.8 ppm

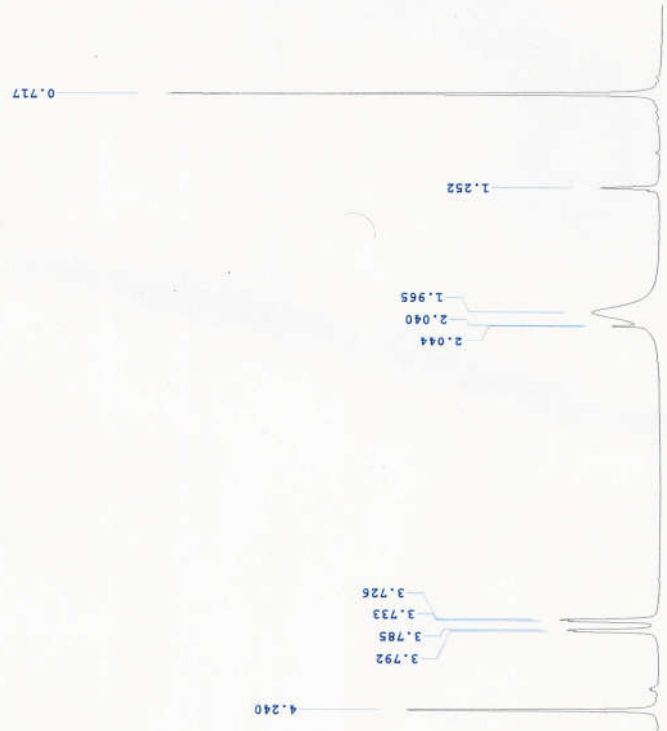

11 10 9 8 7 6 5 4 3 2 1 ppm

|                                                                                                                                                                                            |                                       |                                                                                                                               |                                                                                                                         |                                                                         |
|--------------------------------------------------------------------------------------------------------------------------------------------------------------------------------------------|---------------------------------------|-------------------------------------------------------------------------------------------------------------------------------|-------------------------------------------------------------------------------------------------------------------------|-------------------------------------------------------------------------|
| <p><b>PULSE SEQUENCE</b><br/>         Relax. delay 1.592 sec<br/>         Pulse 45.0 degrees<br/>         Acq. time 3.408 sec<br/>         Width 9615.4 Hz<br/>         16 repetitions</p> | <p><b>OBSERVE</b> HL, 599.7712255</p> | <p><b>DATA PROCESSING</b><br/>         Line broadening 0.3 Hz<br/>         FT size 65536<br/>         Total time 1 minute</p> | <p>Solvent: cdcl3<br/>         Ambient Temperature<br/>         Operator: walkup<br/>         VNMR5-600 "varian600"</p> | <p>sh 564<br/>         File: exp<br/>         Pulse Sequence: s2pul</p> |
|--------------------------------------------------------------------------------------------------------------------------------------------------------------------------------------------|---------------------------------------|-------------------------------------------------------------------------------------------------------------------------------|-------------------------------------------------------------------------------------------------------------------------|-------------------------------------------------------------------------|

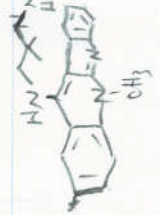

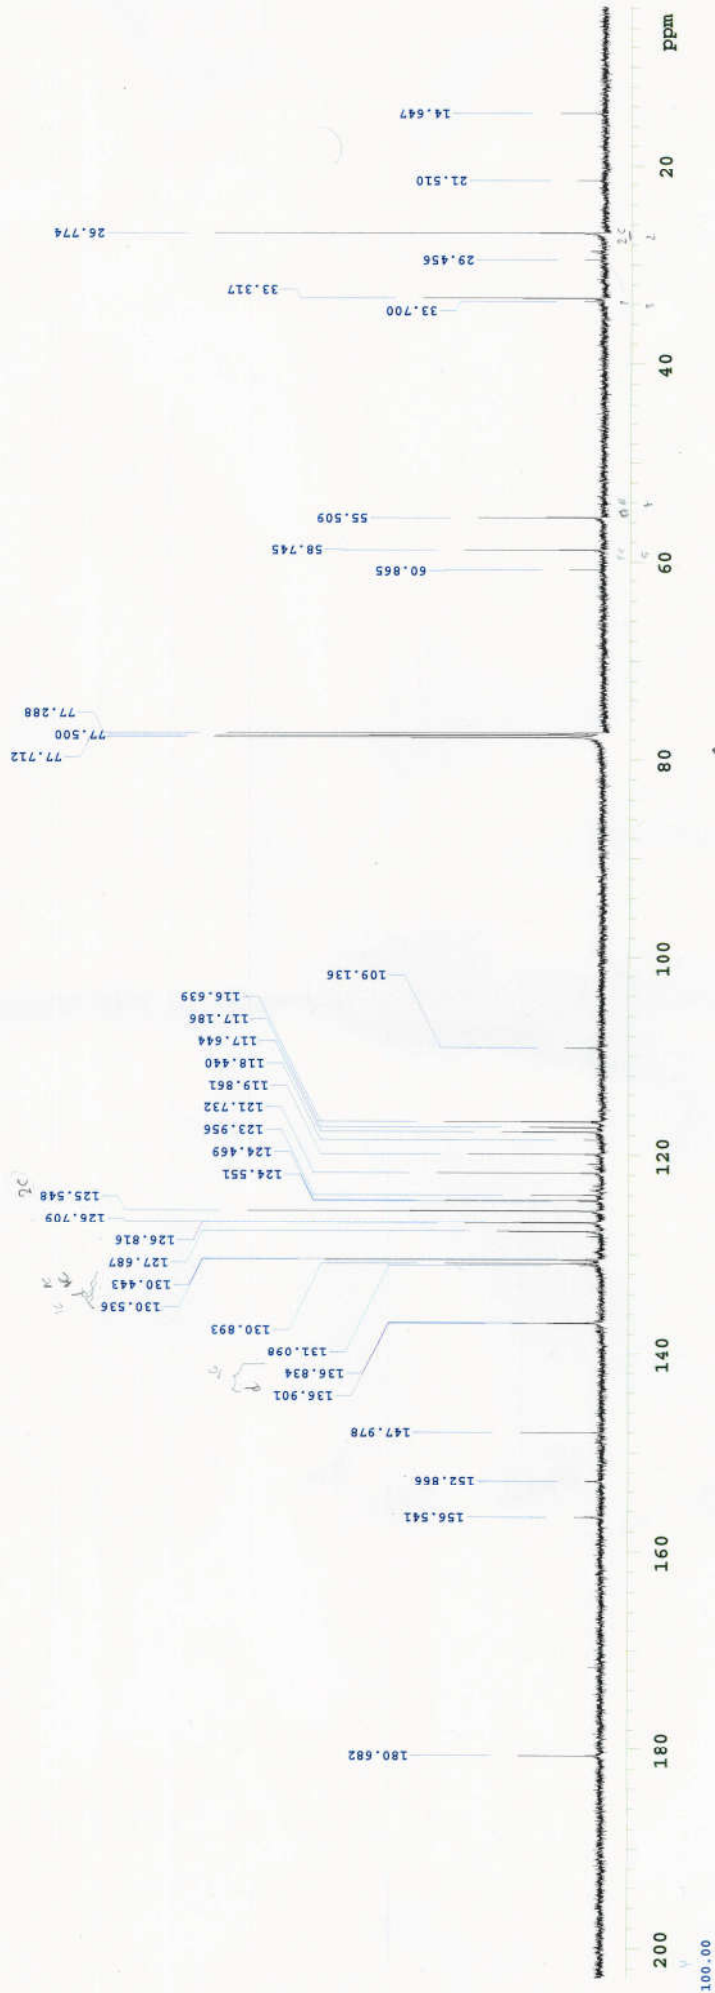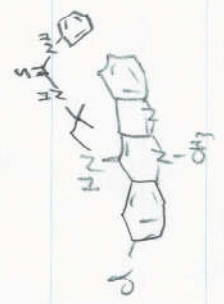

|                                                                                                                                                         |                                                                                                                                     |                                                                                                         |                                                                                                                        |                              |
|---------------------------------------------------------------------------------------------------------------------------------------------------------|-------------------------------------------------------------------------------------------------------------------------------------|---------------------------------------------------------------------------------------------------------|------------------------------------------------------------------------------------------------------------------------|------------------------------|
| <p>PULSE SEQUENCE</p> <p>Relax. delay 0.700 sec</p> <p>Pulse 45.0 degrees</p> <p>Acq. time 1.300 sec</p> <p>Width 36764.7 Hz</p> <p>512 repetitions</p> | <p>OBSERVE C13, 150.8125260</p> <p>DECOUPLE H1, 599.7742324</p> <p>Power 40 dB</p> <p>continuously on</p> <p>WALTZ-16 modulated</p> | <p>DATA PROCESSING</p> <p>Line broadening 1.0 Hz</p> <p>FT size 131072</p> <p>Total time 17 minutes</p> | <p>Solvent: cdcl3</p> <p>Ambient temperature</p> <p>Operator: walkup</p> <p>VMMS-600 *varian600*</p> <p>sh 574 c13</p> | <p>Pulse sequence: s2pul</p> |
|---------------------------------------------------------------------------------------------------------------------------------------------------------|-------------------------------------------------------------------------------------------------------------------------------------|---------------------------------------------------------------------------------------------------------|------------------------------------------------------------------------------------------------------------------------|------------------------------|
